# Efficient coding of natural scenes improves neural system identification

Yongrong Qiu<sup>a,b,c</sup>, David A. Klindt<sup>d</sup>, Klaudia P. Szatko<sup>a,b,c,e</sup>, Dominic Gonschorek<sup>a,b,f</sup>, Larissa Hoefling<sup>a,b,e</sup>, Timm Schubert<sup>a,b</sup>, Laura Busse<sup>g,h</sup>, Matthias Bethge<sup>b,e,i</sup>, and Thomas Euler<sup>a,b,e,✉</sup>

<sup>a</sup>Institute for Ophthalmic Research, U Tübingen, 72076 Tübingen, Germany

<sup>b</sup>Centre for Integrative Neuroscience (CIN), U Tübingen, 72076 Tübingen, Germany

<sup>c</sup>Graduate Training Centre of Neuroscience (GTC), International Max Planck Research School, U Tübingen, 72076 Tübingen, Germany

<sup>d</sup>Department of Mathematical Sciences, Norwegian University of Science and Technology, 7491 Trondheim, Norway

<sup>e</sup>Bernstein Centre for Computational Neuroscience, 72076 Tübingen, Germany

<sup>f</sup>Research Training Group 2381, U Tübingen, 72076 Tübingen, Germany

<sup>g</sup>Division of Neurobiology, Faculty of Biology, LMU Munich, 82152 Planegg-Martinsried, Germany

<sup>h</sup>Bernstein Centre for Computational Neuroscience, 82152 Planegg-Martinsried, Germany

<sup>i</sup>Institute for Theoretical Physics, U Tübingen, 72076 Tübingen, Germany

1 *Neural system identification aims at learning the response*  
2 *function of neurons to arbitrary stimuli using experimen-*  
3 *tally recorded data, but typically does not leverage norma-*  
4 *tive principles such as efficient coding of natural environ-*  
5 *ments. Visual systems, however, have evolved to efficiently process*  
6 *input from the natural environment. Here, we present a nor-*  
7 *mative network regularization for system identification mod-*  
8 *els by incorporating, as a regularizer, the *efficient coding* hy-*  
9 *pothesis, which states that neural response properties of sen-*  
10 *sory representations are strongly shaped by the need to pre-*  
11 *serve most of the stimulus information with limited resources.*  
12 *Using this approach, we explored if a system identification*  
13 *model can be improved by sharing its convolutional filters*  
14 *with those of an autoencoder which aims to efficiently encode*  
15 *natural stimuli. To this end, we built a hybrid model to pre-*  
16 *dict the responses of retinal neurons to noise stimuli. This*  
17 *approach did not only yield a higher performance than the*  
18 *“stand-alone” system identification model, it also produced*  
19 *more biologically-plausible filters. We found these results to*  
20 *be consistent for retinal responses to different stimuli and*  
21 *across model architectures. Moreover, our normatively reg-*  
22 *ularized model performed particularly well in predicting re-*  
23 *sponses of direction-of-motion sensitive retinal neurons. In*  
24 *summary, our results support the hypothesis that efficiently*  
25 *encoding environmental inputs can improve system identi-*  
26 *fication models of early visual processing.*

27 Correspondence: [thomas.euler@cin.uni-tuebingen.de](mailto:thomas.euler@cin.uni-tuebingen.de)

## 28 Introduction

29 In the past years, advances in experimental techniques  
30 enabled detailed, large-scale measurements of activity at  
31 many levels of sensory processing (1). As a consequence,  
32 *neural system identification (SI)* approaches have flour-  
33 *ished* (Fig. 1a top). They empirically fit the stimulus-  
34 *response* (transfer) function of neurons based on experi-  
35 *mentally recorded data* (2–4). A classic example is the  
36 *generalized linear model (GLM, (2, 5))*, which consists of  
37 *a linear filter as a first order approximation of a neuron’s*  
38 *response function* (i.e., its receptive field; (6)), followed  
39 *by a point-wise nonlinear function for the neuron’s output.*  
40 *To account for additional non-linearities* (e.g., (7, 8)), sev-  
41 *eral extensions, such as linear-nonlinear cascades* (9, 10),

42 have been proposed. More recently, deep neural network-  
43 based SI approaches inspired by the hierarchical process-  
44 ing along the visual pathway (11, 12) have been developed  
45 (reviewed in (13–17)). While SI methods became particu-  
46 larly successful in predicting responses of visual neurons  
47 (18–22), they often require large amounts of training data  
48 and, more critically, do rarely consider adaptations to the  
49 natural environment.

50 However, like other senses, vision has evolved to promote  
51 a species’ survival in its natural environment (23), driv-  
52 ing visual circuits to efficiently represent information un-  
53 der a number of constraints, including metabolic limits and  
54 space restrictions (24, 25). As a consequence, the visual  
55 system has adapted to natural statistics, as shown, for ex-  
56 ample, by the fact that the distribution of orientation pref-  
57 erences of visual neurons mirrors the dominance of cardin-  
58 al orientations in natural scenes (26–28).

59 Such adaptations are at the heart of *efficient coding (EC)*  
60 approaches (Fig. 1a bottom): They derive algorithmic prin-  
61 ciples underlying neural systems from the statistical prop-  
62 erties of natural stimuli and by incorporating biological  
63 constraints (15, 24, 25, 29–31). Here, one popular strat-  
64 egy starts from the assumption that early visual processing  
65 serves to decorrelate the redundant signals in natural en-  
66 vironments (32, 33). This theory can reproduce feature  
67 selectivity, e.g., difference-of-Gaussian (DoG) kernels that  
68 have similar receptive field (RF) properties as retinal gan-  
69 glion cells (RGCs; (34)). Recently, deep neural networks-  
70 augmented EC approaches were proposed, such as con-  
71 volutional autoencoders (35, 36), which are trained to op-  
72 timally reconstruct inputs in the presence of an informa-  
73 tion “bottleneck” (i.e., from a constrained latent represen-  
74 tation). Such convolutional autoencoders have been shown  
75 to yield center-surround spatial RFs with similar proper-  
76 ties as those observed in RGCs when encoding either pink  
77 (1/f) noise or natural scenes (37, 38). Still, a downside  
78 of EC is that it is not always straightforward to experimen-  
79 tally measure coding efficiency and feature selectivity pre-  
80 dicted by these approaches in neural systems (discussed in  
81 (39, 40)) and, hence, the interpretation of EC models with

respect to the biological underpinnings remains challenging.

Notably, the intersection between EC and SI has long remained largely unexplored but lately shifted more into focus. In particular, Mlynarski and colleagues recently proposed a theoretical framework incorporating normative theories for statistical inference on simulated or pre-fit neural data (41). Their framework enables conducting rigorous statistical hypothesis tests of coding principles, but has not yet been applied to predicting neural responses to arbitrary stimuli with minimal assumptions. Here, we tested whether the EC hypothesis can serve as a useful inductive bias for learning the response functions of neurons. To do so, we built a hybrid model combining a SI branch with an EC branch, forced the two branches to share filters (Fig. 1b) and asked, if knowledge about natural scene statistics could help predicting retinal responses. To this end, we experimentally recorded  $\text{Ca}^{2+}$  signals of neurons in the mouse retina while presenting it with visual stimuli and then used these responses to train the SI branch, which aims to predict retinal responses. We used natural movies that we recorded in mouse habitats outdoors to train the EC branch, which aims to represent natural scenes efficiently (38). We found a synergy between neural prediction and natural scene statistics: The hybrid approach did not only have a better predictive performance than a pure SI approach, it also produced more biologically-plausible filters. Our results demonstrate that predicting sensory responses benefits from considering adaptations to the natural environment.

## Results

**Hybrid system identification and efficient coding models.** To test if learning an efficient representation of natural input could help predict neuronal responses in the early visual system, we employed *normative regularization*, i.e., statistical regularization that is informed by normative coding principles, such as the idea that sensory systems have evolved to efficiently process natural stimuli. Specifically, we used this strategy to incorporate EC as a regularizer and developed a hybrid model that combines SI-based neural prediction and EC in a single model. The two model branches are linked by shared convolutional filters (Fig. 1b).

The *SI branch* approximates the response functions of recorded neurons to a visual dense noise (see below), and was implemented using a convolutional neural network (CNN) (Fig. 2a). Here, we used an L2 regularization on the convolutional layers to encourage smooth filters (42) and an L1 regularization on the fully connected (FC) layer for sparse readouts ((19); for details, see Methods).

The *EC branch* was trained to efficiently reconstruct input stimuli (i.e., natural scenes) from a constrained latent representation. For this branch, we used a convolutional autoencoder network that we published before (for details, see (38) and Methods). Also in the EC branch, we en-

forced smooth filters by using L2 regularization, and limited the bandwidth by adding Gaussian noise and imposing L1 regularization on the hidden activations. The latter regularization also encourages sparse representations.

In the *hybrid model*, we implemented interactions between the two branches by shared filters (symbolized by red circle in Fig. 1b). Both branches were trained in parallel, with a weighted sum of their respective losses ( $L_{SI}$  and  $L_{EC}$ ) used as optimization objective. By changing the weighting of the two losses, we were able to control the relative contribution of two branches on shaping the shared filters, and test our hypothesis to which degree efficient representations of natural scenes improve neural predictions (Fig. 2a,b). Specifically, weight  $w$  was used to define the hybrid model's loss function as  $L_{Hybrid} = w \cdot L_{SI} + (1 - w) \cdot L_{EC}$  (Methods). For  $w = 1$ , the EC branch had no influence on the shared filters and, hence, the hybrid model behaved like the pure SI model. Conversely, for  $w = 0$ , the SI branch had no influence on the shared filters and, hence, the hybrid model behaved like the pure EC model. Thus, the smaller the weight, the more the EC branch contributed to shaping the filters.

To evaluate the influence of stimulus statistics on neural response predictions, we fed not only natural stimuli to the EC branch, but also phase-scrambled natural stimuli as well as noise. We refer to these models as *hybrid-natural*, *hybrid-pha-scr* and *hybrid-noise* (Fig. 2c). Moreover, to examine whether the performance improvements could be attributed to simple low-pass filtering, we trained SI networks using spatial convolutional filters composed from different numbers of basis functions derived from principle component analysis (PCA) on natural images (Fig. 2d), or the discrete cosine transform (DCT). These models are referred to as *SI-PCA* and *SI-DCT* networks.

To train the SI branch of our hybrid framework, we recorded somatic  $\text{Ca}^{2+}$  responses from populations of cells in the ganglion cell layer (GCL) of the *ex-vivo* mouse retina to 9-minute long noise stimuli using two-photon imaging (Fig. 3a; Methods; (43, 44)). The GCL contains the RGCs, which represent the retina's output neurons and form in the mouse about 40 parallel feature channels to higher visual brain areas (reviewed in (23)). RGCs gain their specific response properties by integrating upstream input from distinct sets of bipolar cells and amacrine cells. Note that the GCL also contains some "displaced" amacrine cells (dACs; (43, 45)). If not indicated otherwise, we did not distinguish between these two GCL cell classes in our datasets. The noise stimulus contained two chromatic components (UV, green) matching the spectral sensitivities of mouse photoreceptors (46). We used the data of  $n=96$  GCL cells that passed our quality criteria (Methods) to fit a pure SI model with factorized spatial and temporal convolutional filters, whose predictive performance served as our baseline (Fig. 3b left).

**Neural system identification benefits from natural scene statistics.** First, we measured the predictive per-

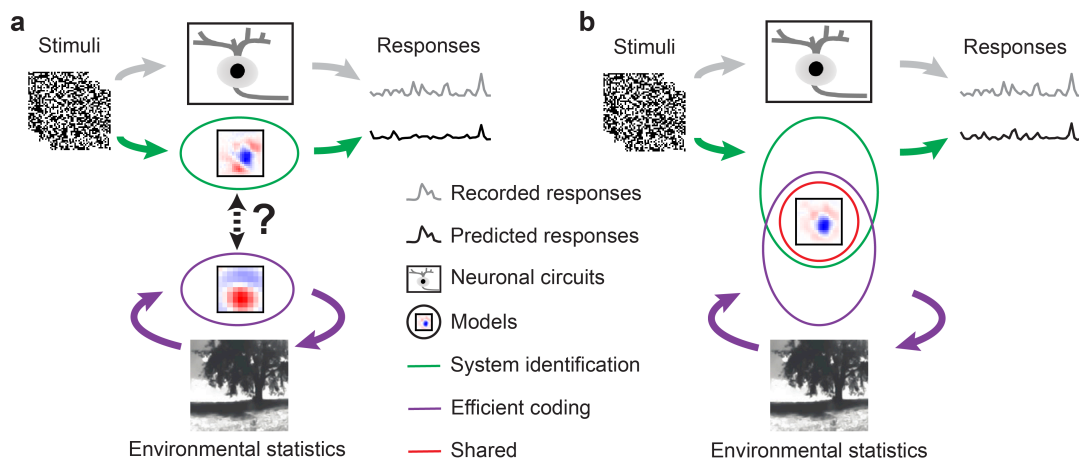

**Fig. 1. Illustration of our hybrid model combining SI and EC.** **a.** Illustration of two common approaches to studying visual systems: system identification, symbolized by the green-labeled branch, aims at predicting responses of neuronal circuits (black rectangle) to specific stimuli, whereas efficient coding (purple-labeled branch) seeks working out principles of the visual system based on environmental statistics. As these two approaches are rarely combined in a single modeling framework, their potential synergies remain largely unexplored. **b.** Our hybrid modeling approach combines system identification (green) and efficient coding (purple) in a single model with shared filters (red circle) to predict neural responses to arbitrary visual stimuli.

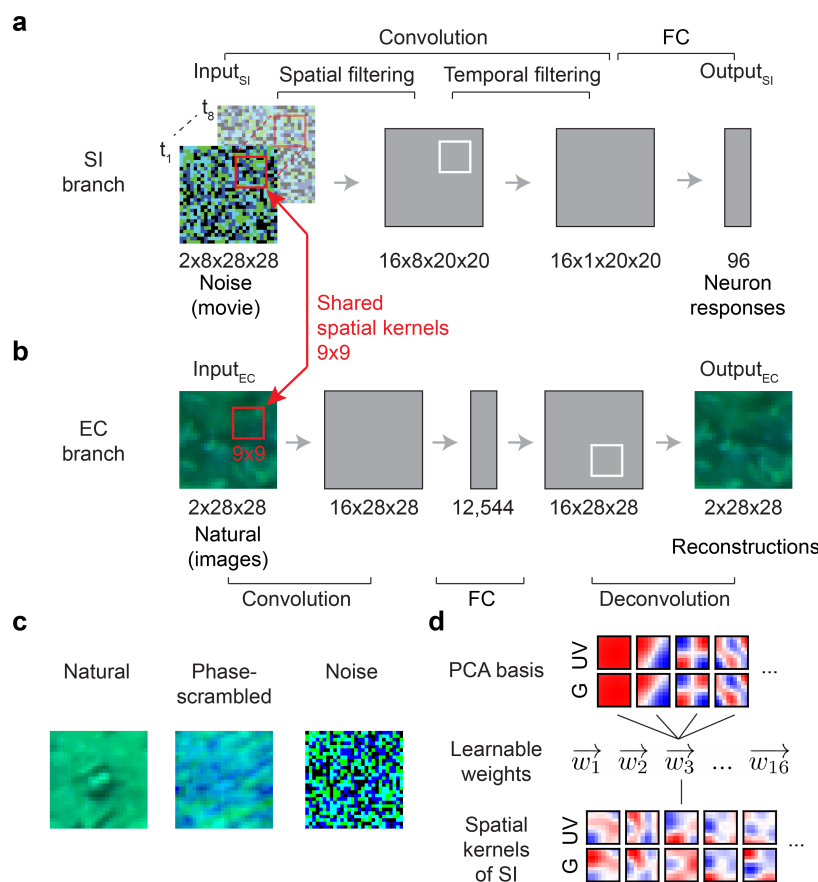

**Fig. 2. Hybrid model with shared spatial filters.** **a,b.** Schemata of SI model (a) and EC model (b) from Qiu et al. (38). The SI model branch consists of spatial and temporal convolutional layers, a fully connected (FC) layer and a nonlinear layer (see Methods). The EC model branch is a convolutional autoencoder, consisting of an encoder and a decoder network. In the hybrid model, the two branches were trained in parallel with shared spatial filters (red). Input<sub>SI</sub>: 8-frame UV-green noise ( $t_1 \dots t_8$ ); Output<sub>SI</sub>: predicted GCL cell Ca<sup>2+</sup> responses; Input<sub>EC</sub>: UV-green natural images; Output<sub>EC</sub>: reconstructed Input<sub>EC</sub>. **c.** Example for the different inputs (natural images, phase-scrambled natural images, and noise) for the EC branch in hybrid models (*hybrid-natural*, *hybrid-pha-scr*, *hybrid-noise*). **d.** Using PCA filters as basis vectors for spatial convolutional filters of the SI model; SI-PCA learned 16 weight vectors ( $\vec{w}_1 \dots \vec{w}_{16}$ ) with same vector length as the number of PCA basis elements.

193 performance of the hybrid-natural model on the validation  
194 data (for hyperparameter tuning) by systematically vary-  
195 ing the relative impact of the two branches by changing  
196 the weight  $w$ . We found that the performance steadily in-  
197 creased with increasing EC influence (i.e., decreasing  $w$ )  
198 up to an optimum (peaking at  $w = 0.2$ ; Fig. 3c, red), af-  
199 ter which the SI had too little influence on the shared fil-  
200 ters and the performance dropped. Note that the correla-  
201 tion values for the validation data are relatively low be-  
202 cause these predictions were calculated on a single-trial  
203 basis (Methods).

204 Next, we replaced the natural input to the EC pathway by  
205 phase-scrambled scenes (*hybrid-pha-scr*) and white noise  
206 across space and chromatic channels (*hybrid-noise*). Like  
207 for the hybrid-natural model, the performance of the two  
208 control models also increased with increasing EC influ-  
209 ence up to a certain point, peaking at  $w = 0.3$  and  $w =$   
210  $0.4$  for *hybrid-pha-scr* and *hybrid-noise*, respectively (Fig.  
211 3c). This indicates that when incorporating EC, all hybrid  
212 model versions showed some improvement up to certain  $w$   
213 values, before performance sharply declined.

214 To test to what extent simple low-pass filtering contributes  
215 to the performance improvement observed for the hybrid-  
216 natural model, we quantified the performance of two addi-  
217 tional SI models, one with PCA and the other one with  
218 DCT bases. By varying the number of bases used, we  
219 found a maximum in predictive performance at 16 and 4  
220 bases for SI-PCA and SI-DCT (zig-zag ordering), respec-  
221 tively (Suppl. Fig. S1b).

222 Finally, to compare the performance on the test data across  
223 models, we picked for each model, the  $w$  or number of  
224 bases with the best predictive performance for the vali-  
225 dation data. We found that the hybrid model with natu-  
226 ral inputs to the EC branch attained the best performance  
227 among all tested models (Fig. 3d,e). The hybrid-natural  
228 model's superior performance compared to the hybrid-  
229 pha-scr model suggests that the benefit of learning natu-  
230 ral scene statistics extends beyond second-order statistics  
231 such as the  $1/f$  power spectrum of natural images. Nev-  
232 ertheless, the hybrid-pha-scr model performed better than  
233 the hybrid-noise version, pointing at a general benefit of  
234 learning second-order statistics in the EC branch. More-  
235 over, the hybrid-natural model was consistently better than  
236 low-pass filtering control models (*SI-PCA* and *SI-DCT*),  
237 suggesting that simple low-pass filtering does not fully ex-  
238 plain the benefits of sharing kernels with the EC branch  
239 trained to efficiently represent natural stimuli.

240 Together, our results suggest that normative network reg-  
241 ularization — in particular, based on natural statistics —  
242 can improve the performance of neural SI models.

243 **Hybrid models with natural inputs learn the most bi-**  
244 **ologically-plausible filters.** To confirm that our hybrid  
245 models capture the properties of the recorded cells, we  
246 estimated their RFs (Fig. 3b; Suppl. Fig. S1f; Meth-  
247 ods). Indeed, we found that the models learned antago-  
248 nistic center-surround RFs with biphasic temporal kernels,

249 reminiscent of RGC RFs found in other studies (2, 43). To  
250 get insights to which degree our models resembled biolog-  
251 ical vision systems, we next investigated the internal repre-  
252 sentations by analyzing the filters of the models' subunits  
253 (18, 47). To this end, we compared the shared spatial con-  
254 volutional filters between our tested models. As neurons in  
255 the retina and further upstream in the early visual system  
256 often feature smooth, Gaussian or DoG shaped RFs (e.g.,  
257 (43, 48, 49)), we considered models with such shared fil-  
258 ters as more biological plausible than those with other filter  
259 organizations.

260 Interestingly, while the learned neuronal RFs were quite  
261 consistent between models (cf. Fig. 3b), their shared spa-  
262 tial filters differed considerably (Fig. 3f,h). When us-  
263 ing natural images in the EC branch (*hybrid-natural*), fil-  
264 ters indeed became smoother and more Gaussian-shaped,  
265 which may be a result of the regularization by the EC  
266 branch on the SI branch and which may have contrib-  
267 uted to the performance improvement of predicting re-  
268 sponses. This effect persisted though reduced when phase-  
269 scrambled images were used (*hybrid-pha-scr*). More-  
270 over, for smaller  $w$  values (i.e., stronger EC influence),  
271 Gaussian-shaped filters became more frequent in the  
272 hybrid-natural but not in the hybrid-noise model (Fig. 3f,  
273 upper vs. lower row). For the SI models with PCA or DCT  
274 basis, we found all filters to be smooth as they profited  
275 from low-pass filtering of the respective transformation.  
276 However, compared to the hybrid-natural model, their fil-  
277 ters were less frequently Gaussian-shaped (Fig. 3h).

278 To quantify these findings, we fitted 2D Gaussian func-  
279 tions to the filters and measured the goodness of the fit  
280 via the coefficient of determination (R-squared; Methods).  
281 Notably, for all three hybrid models, the  $w$  with the best  
282 Gaussian fit was the same  $w$  that also resulted in the best  
283 response predictive performance ( $w = 0.2$ ,  $w = 0.3$ , and  
284  $w = 0.4$  for *hybrid-natural*, *hybrid-pha-scr*, and *hybrid-*  
285 *noise*, respectively; Fig. 3g). The filters of the hybrid-  
286 natural model resembled smooth 2D Gaussians more than  
287 for any other model (Fig. 3i), including SI-PCA and SI-  
288 DCT. The difference of fit quality between hybrid-natural  
289 vs. hybrid-pha-scr and hybrid-pha-scr vs. hybrid-noise  
290 may be related to higher-order statistics and second-order  
291 statistics of natural scenes, respectively.

292 Taken together, our comparisons of the hidden spatial rep-  
293 resentations suggest that natural scene statistics promote  
294 latent feature representations akin to transformations in the  
295 early visual system.

296 **Efficient coding increases the data efficiency of sys-**  
297 **tem identification.** Next, we asked if the observed per-  
298 formance increase in the hybrid-natural vs. the baseline SI  
299 model was sensitive to the amount of training data, both  
300 with respect to their response predictions (Fig. 4a) and  
301 their learned spatial filters (Fig. 4b). To this end, we  
302 trained the SI and the hybrid-natural model ( $w = 0.2$ ) with  
303 different amounts of data, ranging from 30% to 100%.

304 Not unexpectedly, when more training data was used, pre-

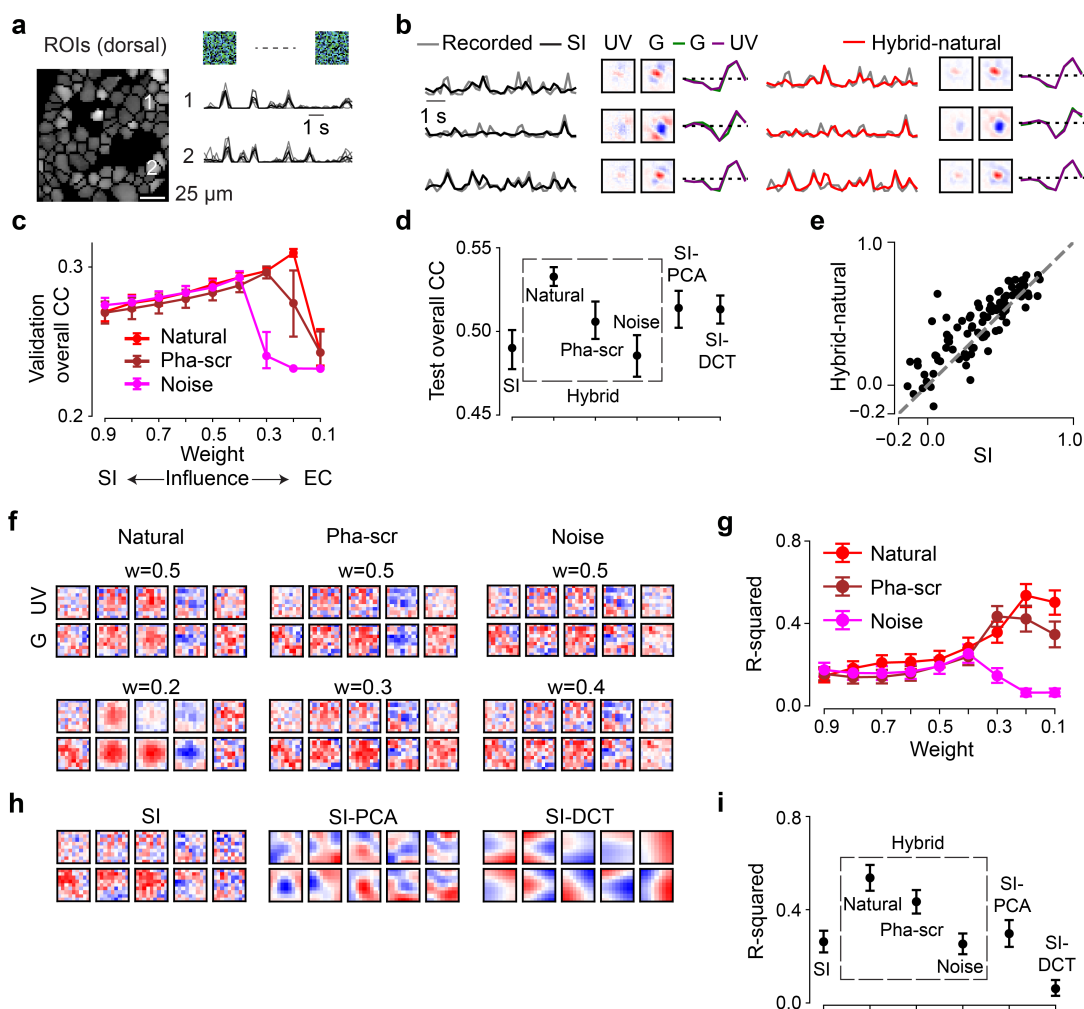

**Fig. 3. Neural encoding tasks benefit from natural scene statistics.** **a.** Region-of-interest (ROI) mask of one recording field in dorsal retina (left) and mean  $\text{Ca}^{2+}$  responses (black) of exemplary ROIs in response to 6 repeats of noise stimuli (single trials in gray). **b.** Three representative GCL cell responses (gray) to the noise stimulus (cf. Fig. 2a, left), together with predictions of best performing models on test data (black, SI; red, hybrid w/ natural scenes as input to the EC path, i.e.,  $\text{Input}_{\text{EC}}$ ), and learned spatio-temporal receptive fields (RFs) visualized by SVD. **c.** Model performance (linear correlation coefficient, CC; mean for  $n=10$  random seeds per model) based on validation data for hybrid model with natural scenes (red), with phase-scrambled scenes (brown), or with noise (magenta) as  $\text{Input}_{\text{EC}}$ , and for different weights. **d.** Best performance (mean for  $n=10$  random seeds per model) based on test data for SI, SI-PCA (16 bases), SI-DCT (4 bases), hybrid-natural ( $w=0.2$ ), hybrid-pha-scr ( $w=0.3$ ) and hybrid-noise ( $w=0.4$ ;  $p<0.0001$  for SI vs. hybrid-natural,  $p=0.0085$  for SI-PCA vs. hybrid-natural,  $p=0.0011$  for hybrid-natural vs. hybrid-pha-scr, two-sided permutation test,  $n=10,000$  repeats). **e.** Scatter plot for model predictions based on test data for hybrid-natural ( $w=0.2$ ) vs. SI at one random seed, with each dot representing one neuron. **f.** Representative spatial filters (shared convolutional filters) for hybrid models with different  $\text{Input}_{\text{EC}}$  and different weights. Upper: with  $w=0.5$ ; lower: with optimal  $w$  (see (c)) for hybrid models. **g.** Mean R-squared of fitting a 2D Gaussian to spatial filters (cf. (f)), for hybrid model with natural scenes (red), with phase-scrambled scenes (brown), or with noise (magenta) as  $\text{Input}_{\text{EC}}$ , and for different  $w$  ( $n=10$  random seeds per model). **h.** Representative spatial filters (shared convolutional filters) for SI, SI with PCA filters (16 bases) and SI with DCT filters (4 bases). **i.** Mean R-squared of fitting a 2D Gaussian to the spatial filters for one chromatic stimulus channel (green;  $n=10$  random seeds per model;  $p<0.0001$  for SI vs. hybrid-natural,  $p<0.0001$  for SI-PCA vs. hybrid-natural,  $p=0.0074$  for hybrid-natural vs. hybrid-pha-scr, two-sided permutation test,  $n=10,000$  repeats). Error bars in (c),(d),(g),(i) represent 2.5 and 97.5 percentiles obtained from bootstrapping.

dictive performance increased for both models (Fig. 4a top). However, we also found that the performance of the hybrid-natural model was consistently higher than that of the SI model, with the difference becoming significant for  $\geq 60\%$  and peaking at around 90% training data (Fig. 4a bottom). Additionally, for both models the spatial filters became increasingly more Gaussian-like with more data (Fig. 4b). We also observed that the performance difference dropped for large dataset sizes — which, we expect, may be asymptotically near zero in the regime of infinite data.

Together, these results suggest that a hybrid-natural model, which has access to natural statistics, requires significantly

less training data than the baseline SI model.

**Hybrid models for testing temporal coding strategies.** It has been suggested that early stages of visual processing, rather than encoding a past stimulus, aim at predicting future stimuli in their temporal stream of inputs (24, 50–52). Such a future prediction strategy is thought to require a smaller dynamic range to be encoded than that needed for representing past stimuli (past encoding), and thus allows for lower energy consumption (53, 54). Therefore, we next tested if the neural encoding task would profit even more from natural statistics when spatio-temporal (i.e., 3D) filters were shared between the hybrid model's

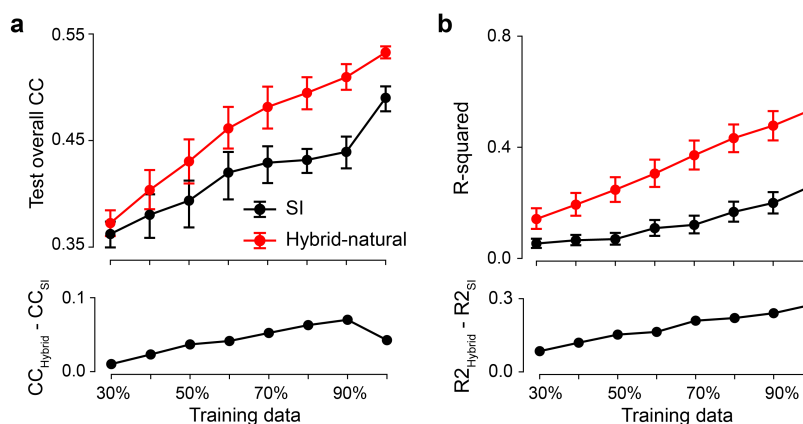

**Fig. 4. Hybrid-natural models with better data efficiency for neural prediction.** **a.** Mean model performance (top) based on test data for SI and hybrid-natural ( $w=0.2$ ;  $n=10$  random seeds) with different training data sizes and mean difference between SI and hybrid-natural (bottom). **b.** Mean R-squared (top) of fitting a 2D Gaussian to spatial filters for green stimulus channel for SI and hybrid-natural ( $w=0.2$ ;  $n=10$  random seeds) with different training data sizes, and the mean difference between R-squared for SI and hybrid-natural (bottom). Error bars represent 2.5 and 97.5 percentiles with bootstrapping.

330 two branches. We implemented both strategies — past  
 331 encoding and future prediction — in the EC branch, and  
 332 compared their influence on the SI task (55).

333 We modified the 2D SI model to use spatio-temporal (in-  
 334 stead of factorized spatial and temporal) convolutional fil-  
 335 ters to predict neural responses for 8-frame noise movies  
 336 (3D SI model; Suppl. Fig. S2a). Likewise, we employed  
 337 spatio-temporal convolutional filters for the EC branch. As  
 338 before, the two branches of the resulting hybrid model  
 339 were trained in parallel, but now sharing spatio-temporal  
 340 filters. In the past encoding case, the EC branch was  
 341 trained to reconstruct the 7<sup>th</sup> frame (at  $t - 1$ ) of a contin-  
 342 uous 8-frame natural movie clip based on frames at  $t - 7$   
 343 to  $t$  (hybrid-natural-past; Suppl. Fig. S2b,c). In the future  
 344 prediction case, the EC branch was trained to predict the  
 345 8<sup>th</sup> unseen frame based on the first 7 frames ( $t - 7$  to  $t - 1$ )  
 346 of the clip (hybrid-natural-future; Suppl. Fig. S2d left).

347 Like for the 2D models, we varied  $w$  or the number of  
 348 bases and then selected the best model for each condition  
 349 (3D SI, hybrid-natural-past, hybrid-natural-future, and 3D  
 350 SI-PCA) based on validation performance. We next quan-  
 351 titatively compared the different models using the test data  
 352 (Fig. 5a,b; Suppl. Fig. S3c). We found that the 3D SI-  
 353 PCA model outperformed the 3D SI model, presumably  
 354 because the former profited from the low-pass filtering of  
 355 the PCA transformation. Importantly, both hybrid models  
 356 displayed a better performance than the 3D SI-PCA model.  
 357 While the hybrid-natural-past model performed slightly  
 358 better than its hybrid-natural-future counterpart, this dif-  
 359 ference was not statistically significant. In summary, both  
 360 the past encoding and future prediction strategy in the EC  
 361 branch turned out to be equally beneficial for the neural  
 362 encoding task and, as before, the benefit extended beyond  
 363 low-pass filtering effects. However, no performance in-  
 364 crease was achieved with respect to the 2D hybrid-natural  
 365 model (Fig. 5b vs. Fig. 3d).

366 We also analyzed the shared spatio-temporal filters using  
 367 the same metric as for the 2D case, which assesses the sim-

368 ilarity between spatial filters (after performing a low-rank  
 369 decomposition of 3D shared filters into spatial and tempo-  
 370 ral components; see Methods) and smooth 2D Gaussians  
 371 (Fig. 5c,d). Again, we found higher R-squared values for  
 372 the hybrid models and the 3D SI-PCA model compared to  
 373 the baseline SI case. Note that here, the 3D SI-PCA  
 374 model did not significantly differ from the two hybrid mod-  
 375 els, possibly due to a large number of bases ( $n = 128$  vs.  
 376  $n = 16$  in the 2D case).

377 Next, we asked if the fact that we did not see a significant  
 378 advantage of 3D over 2D could be due to the relatively  
 379 slow (5 Hz) noise stimulus, which may drive insufficiently  
 380 temporal properties of the GCL cell responses. There-  
 381 fore, we recorded a new dataset ( $n = 64$  cells) in which  
 382 we presented a 30-Hz dense noise stimulus and used it  
 383 with the 3D hybrid models. Like for 5-Hz noise, hybrid-  
 384 natural-past and hybrid-natural-future models performed  
 385 similarly on the validation data, with a peak in perfor-  
 386 mance at around  $w = 0.7$  (Suppl. Fig. S4a), as well as on  
 387 the test data, where they were significantly better than the  
 388 3D SI model (Suppl. Fig. S4b). Moreover, both 3D hy-  
 389 brid models learned shared filters with similar R-squared  
 390 values, which were significantly higher than that of the 3D  
 391 SI model (Suppl. Fig. S4c). But again, the 3D models  
 392 performed only equally well compared to the 2D models.

393 In summary, the hybrid-natural models achieved a higher  
 394 performance for different noise stimuli (5-Hz vs. 30-Hz)  
 395 and different shared filter organizations (2D vs. 3D) than  
 396 all other tested models. Therefore, it is likely that their su-  
 397 perior predictive performance for neuronal responses and  
 398 their more biologically plausible filters resulted from the  
 399 EC branch having access to natural statistics.

400 **Direction-selective neurons benefit more than oth-**  
 401 **ers from hybrid models.** The retina encodes the visual  
 402 scene in a number of features that are represented by the  
 403 more than 40 different types of RGC whose outputs are  
 404 relayed in parallel to higher visual centers in the brain  
 405 (43, 56–59). Thus, we next asked, if access to natural

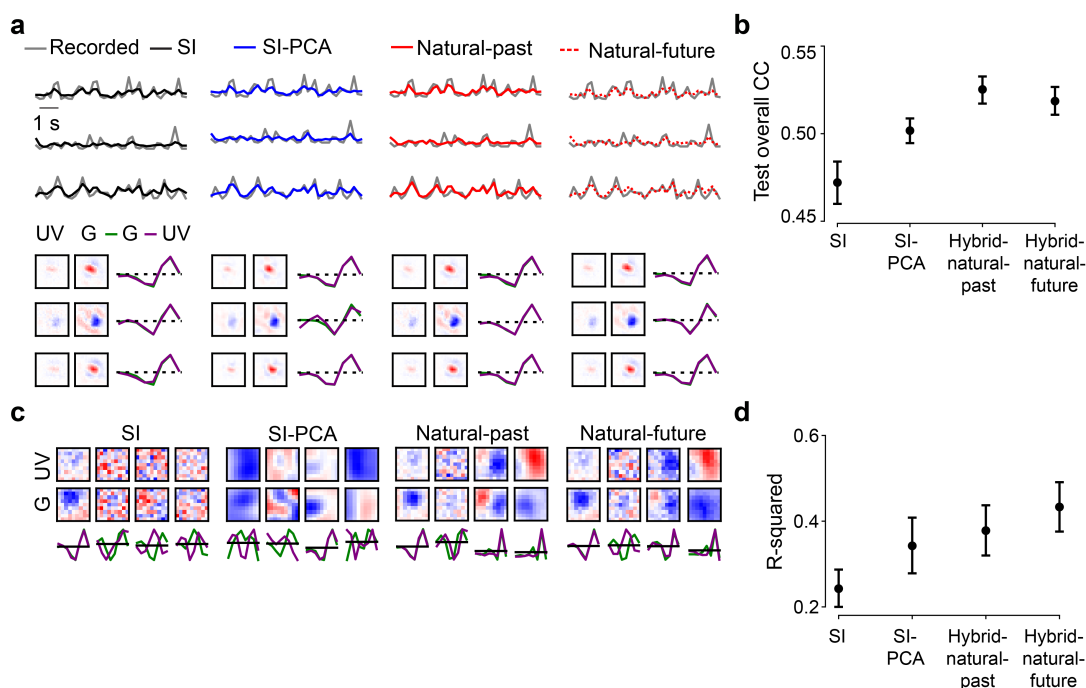

**Fig. 5. Past encoding or future prediction strategies using 3D shared filters perform equally well.** **a.** Top row: Responses of three exemplary GCL cells to 5-Hz noise stimulus (gray) and predictions of best performing models on test data (black, SI; blue, SI with PCA filters; red solid, hybrid for encoding the past; red dotted, hybrid for predicting the future). Bottom row: Respective learned RFs of the three cells (visualized by SVD). **b.** Mean model performance based on test data for SI, SI-PCA (128 bases), hybrid-natural-past, and hybrid-natural-future (both  $w=0.4$ ;  $n=10$  random seeds;  $p<0.0001$  for SI vs. hybrid-natural-past,  $p=0.0005$  for SI-PCA vs. hybrid-natural-past,  $p=0.2563$  for hybrid-natural-past vs. hybrid-natural-future, two-sided permutation test,  $n=10,000$  repeats). **c.** Representative shared spatial and temporal filters of 3D models ( $n=1$  random seed, visualized by SVD; temporal kernels for UV and green stimulus channels indicated by purple and green, respectively). **d.** Mean R-squared of fitting a 2D Gaussian to shared spatial filters (for green stimulus channel;  $n=10$  random seeds per model;  $p=0.0003$  for SI vs. hybrid-natural-past,  $p=0.4356$  for SI-PCA vs. hybrid-natural-past,  $p=0.1895$  for hybrid-natural-past vs. hybrid-natural-future, two-sided permutation test,  $n=10,000$  repeats). Error bars in (b),(d) represent 2.5 and 97.5 percentiles with bootstrapping.

406 statistics allows our hybrid models to predict some cell  
 407 types better than others (Fig. 6). Earlier, it has been shown  
 408 that motion-relevant properties emerge in the efficient cod-  
 409 ing framework for both past encoding and future prediction  
 410 approaches (55). Therefore, we employed our 3D hybrid  
 411 models (cf. Fig. 5) and focused on direction-selective (DS)  
 412 cells (43, 60).

413 For this analysis, we used a set of  $n=427$  GCL neurons,  
 414 whose responses were recorded not only to the 5-Hz noise  
 415 stimulus (for training the models) but also to full-field  
 416 chirp and moving bar stimuli. The latter two stimuli (Fig.  
 417 6a) enabled us to identify the functional type of each  
 418 recorded GCL neuron (43) using a cell type classifier (see  
 419 Methods; Suppl. Fig. S5).

420 To explore cell type-specific effects, we chose a dataset  
 421 size (30% of total recording time) for which the synergy  
 422 between neural SI and EC was particularly pronounced.  
 423 As expected, we found that both hybrid networks (*hybrid-*  
 424 *natural-past* and *hybrid-natural-future*) performed signifi-  
 425 cantly better than the SI model, with no significant differ-  
 426 ence between the two hybrid models (cf. Fig. 5b, Suppl.  
 427 Fig. S4b).

428 First, we evaluated if any of the broader functional groups  
 429 of GCL cells profited more from natural statistics than oth-  
 430 ers. For this, we sorted the cells into 6 groups based on  
 431 their response polarity (ON vs. OFF) and transience, and

432 based on whether they were RGCs or dACs (for group  
 433 sizes, see Fig. 6 legend). For all 6 groups, the hybrid  
 434 models showed a better predictive performance than the SI  
 435 model (Fig. 6b). However, no significant differences were  
 436 observed between any pair of groups ( $p>0.05$  for all pair-  
 437 wise comparisons, two-sided permutation test,  $n=10,000$   
 438 repeats; Fig. 6c) and the two hybrid models ( $p>0.05$  for all  
 439 pair-wise comparisons; Suppl. Fig. S6a).

440 Next, we grouped the cells into DS ( $p<0.05$ , direction  
 441 tuning using a permutation test;  $n=90$ ) and non-DS cells  
 442 ( $n=300$ ) based on their moving bar responses (Fig. 6a  
 443 right). Note that  $n=37$  neurons were excluded as they did  
 444 not pass the quality check for chirp and moving-bar re-  
 445 sponses (Methods). We found that the predictive perfor-  
 446 mance for DS cells was significantly higher than that of  
 447 the non-DS cells for both hybrid-natural-past (Fig. 6d,e;  
 448  $p=0.0027$ ) and hybrid-natural-future (Suppl. Fig. S6b,c;  
 449  $p=0.0042$ ). To test whether this performance difference  
 450 was merely due to different signal-to-noise ratios in DS vs.  
 451 non-DS cells, we compared their response quality indices  
 452 ( $QI$ ; Methods). While DS cells had significantly higher  
 453  $QI$  values for moving-bar responses ( $QI_{bar}$ ) than non-DS  
 454 cells, we did not find any significant difference between the  
 455 two groups with respect to their noise ( $QI_{noise}$ ) or chirp  
 456 responses ( $QI_{chirp}$ ; Suppl. Fig. S6e-g). These results sug-  
 457 gest that DS cells benefit more from the EC branch of the  
 458 hybrid models than non-DS cells, partially consistent with

earlier findings ((55); see also Discussion).

In summary, efficient coding of natural statistics served as a beneficial normative regularization for all types of mouse GCL cells and in particular DS cells, suggesting the potential role of motion statistics in the natural environment on shaping neuronal response properties.

## Discussion

In this study, we asked if access to natural scene statistics can help predicting neural responses. To address this question, we combined system identification (SI, (3)) and efficient encoding (EC, (25)) methods into a normatively regularized (hybrid) modeling framework. Specifically, we used models that efficiently represent natural scenes recorded in the mouse' habitat to regularize models that predict retinal responses to visual stimuli. We analyzed such hybrid models with shared spatial filters, and found that natural images as input to the EC branch indeed improved the performance in predicting retinal responses and allowed the model to generate filters that resembled RFs found in the early visual system. These improvements extend beyond those gained by simple low-pass filtering or using second-order statistics of the natural scenes. Our hybrid models with shared spatio-temporal filters performed similarly well as those with shared spatial filters, independently of whether they used a past encoding or a future prediction strategy. Notably, predictions for DS cells in the mouse retina improved the most in the hybrid models with natural input. In summary, our results suggest that sourcing information about an animal's environment — e.g., through hybrid SI-EC models — helps building more predictive and biologically-plausible models of neuronal networks. More generally, our findings lend support to the idea that knowledge of natural statistics is already encoded in sensory circuits.

**Hybrid models improve data efficiency.** The difference in predictive performance between the hybrid and the baseline SI model was significant and it depended on the amount of available data, indicating that our hybrid modeling approach increased data efficiency. We note that both the stimulus (dense noise) and the neural model system (retinal neurons) present much easier SI problems than, for instance, predicting more nonlinear neural responses to natural stimuli (18, 61). For those more challenging problems at downstream visual areas, where neural response functions and, hence, the neural prediction tasks, become more complex (62), the data efficiency of a hybrid approach and the improvement from natural scene statistics may be even higher.

**Biological plausibility and temporal coding principles in hybrid models.** The biological plausibility of most learned models was positively correlated with their predictive performance except some indeterminacy for SI-DCT models, suggesting that more biologically plausible filters increased performance. Note that we used the filters'

similarity to smooth 2D Gaussian functions as a measure of biological plausibility, following the assumption that RFs in the retina (and at early downstream stages of the visual system) often feature smooth, Gaussian-like structure (43, 48, 49). However, a deep, systematic understanding of artificial and neuronal networks and their hidden representations likely calls for other methods besides of filter inspection (discussed in (63)).

As the natural environment is not static, we also created hybrid models that acknowledge the time domain by sharing spatio-temporal filters. Surprisingly, both variants — past encoding and future prediction — behaved quite similar. However, in the stand-alone EC models (that is only the respective EC branch), the temporal components of the filters learned by the future prediction were much more diverse than those of past encoding (Suppl. Fig. S2c,d right). Interestingly, the differences between temporal filter of these stand-alone EC models decreased with the incorporation of the neural prediction task in the hybrid models.

The filter diversity in our 3D hybrid models is reminiscent of earlier findings by Chalk and colleagues (2018), who reported the emergence of filters sensitive to motion direction and motion speed in their past encoding and future prediction EC models, respectively. However, in contrast to their results, we did not see a difference between our hybrid-past and hybrid-future models with respect to motion-sensitive filters: Both of them performed better in predicting responses of DS vs. non-DS cells. Further work is needed to understand that partial (mis)match between our work and that by Chalk et al., and why specifically DS cells profited from both our 3D hybrid models.

**Hybrid models of retinal signal processing.** It has been suggested that natural stimuli drive more diverse neural responses, and more complex feature transformations are required to determine the respective stimulus-response functions ((18, 64), but also see (65)). Therefore, one future direction may be to record retinal activity while presenting natural movies (e.g., from (38)) and use it as input for the SI branch of the hybrid model. Finding a more pronounced performance improvement compared to the baseline SI model would support the notion that the noise stimulus we used in this study may have indeed limited the benefits from the EC branch (see above). Neural data to natural stimuli would also allow us to revisit our hybrid models with respect to the prediction of motion sensitive cells and the differences between our results and those from earlier work ((55); see above). Furthermore, such data may be useful for characterizing model generalization (domain transfer, see e.g., (61, 64)) by using responses to natural stimuli as unseen test data with a hybrid model trained with cell responses to noise stimuli.

For our current analysis, we used broad group assignments (e.g., FastON RGCs), which include several functional types of RGC (e.g., ON-step, ON-transient, ON-high-frequency etc; (43)) or dACs, but did not detect any



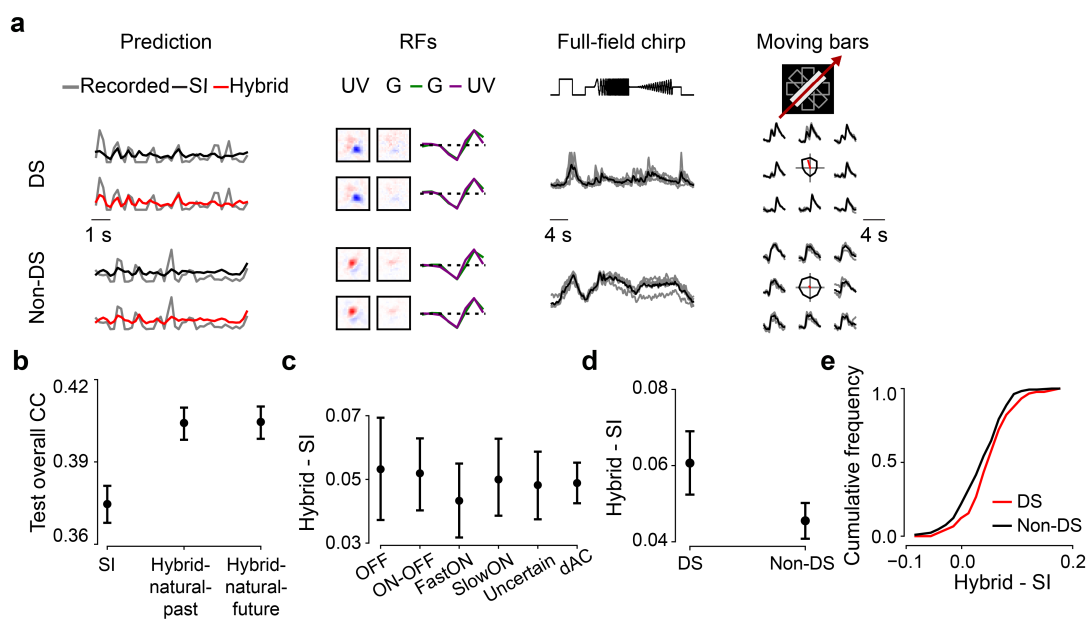

**Fig. 6. Direction-selective (DS) neurons benefit more from hybrid models.** **a.** Recorded (gray) and predicted (black, SI; red, hybrid-natural-past; response amplitude scaled with a constant 1.5 for better visualization) responses to noise, RFs, as well as full-field chirp responses and moving bar responses (gray, single trials; black, means) of representative DS and non-DS cells. Note that the RFs were dominated by UV stimulus channel because cells were recorded in ventral retina (see Methods). **b.** Mean model performance based on test data for SI, hybrid-natural-past and hybrid-natural-future (both  $w = 0.7$ ;  $n=10$  random seeds per model; trained with responses of  $n=427$  GCL cells to 5-Hz noise stimulus;  $p<0.0001$  for SI vs. hybrid-natural-past,  $p=0.9307$  for hybrid-natural-past vs. hybrid-natural-future; two-sided permutation test,  $n=10,000$  repeats). **c.** Difference in mean performance between hybrid-natural-past and SI based on test data for 6 broad functional groups of GCL cells (35 OFF, 59 ON-OFF, 49 fast-ON, 38 slow-ON, and 64 uncertain RGCs, as well as 145 dACs; see Methods and Results;  $n=10$  random seeds per model). **d.** Like (b) but for  $n=90$  DS and  $n=300$  non-DS cells. **e.** Cumulative histogram of difference in mean prediction between hybrid-natural-past ( $w = 0.7$ ) and SI on test data for DS (red) and non-DS cells (black), at one particular seed. Error bars in (b)–(d) represent 2.5 and 97.5 percentiles with bootstrapping.

569 differences in performance gain except for the DS neurons.  
 570 Still, it is possible that distinct types of RGC profit more  
 571 than others from the EC branch of our hybrid models. For  
 572 example, the so-called W3 RGCs, for which the best stimu-  
 573 lus found so far is a small dark moving spot (66), may  
 574 not be “designed“ to efficiently represent natural stimuli  
 575 but rather to extract survival-relevant features (i.e., detect-  
 576 ing aerial predators). Here, we could build models with  
 577 different normative regularization or tasks (i.e., detecting  
 578 predators in images of the sky) and would expect that this  
 579 RGC type profits little from efficiently encoding natural  
 580 statistics in the hybrid model. Studying coding strategies  
 581 across RGC types could contribute an important biological  
 582 perspective to the perennial debate between efficient cod-  
 583 ing (67) and feature detection (56) proponents.

584 **Normative network regularization as a framework**  
 585 **for studying neural coding.** In this study, we regularized  
 586 the filters of a SI model with a normative EC model to pre-  
 587 dict visually-evoked responses of cells in the retina. Some  
 588 forms of such normative regularization have also been dis-  
 589 cussed and/or applied in earlier work. For example, Dene-  
 590 eve and Chalk (68) discussed the relations between SI (en-  
 591 coding) models and EC, and argued that the latter may pro-  
 592 mote shifting the focus in SI from the single-cell to the  
 593 population level. The integration of stimulus-oriented ap-  
 594 proaches (such as EC) for discriminative tasks (such as ob-  
 595 ject recognition) was proposed by Turner et al. (15). Later,  
 596 Teti et al. (69) employed sparse coding with lateral inhibi-

597 tion in simulations of neuronal activation in visual cortex.  
 598 More recently, Młynarski et al. (41) presented a probabilis-  
 599 tic framework combining normative priors with statistical  
 600 inference and demonstrated the usefulness of this approach  
 601 for the analysis of diverse neuroscientific datasets. How-  
 602 ever, their work was rather conceptual, with the datasets  
 603 they used being either simulated or low-dimensional. No-  
 604 tably, they tested their framework on pre-fit retinal RFs,  
 605 but not directly on actual RGC stimulus-response data.  
 606 Compared to their framework, our method does not require  
 607 marginalization across all parameter space to estimate op-  
 608 timality and could be applied to more general or complex  
 609 inference problems. Hence, our work not only provides  
 610 further evidence to the feasibility of combining coding  
 611 principles for identification of neural response properties  
 612 on high-dimensional data, it also demonstrates the benefits  
 613 of leveraging natural scene statistics for neural prediction.  
 614 However, compared to the framework by Młynarski et al.,  
 615 with our approach it is more difficult to conduct rigorous  
 616 statistical tests of normative theory.

617 We expect that our hybrid modeling strategy may also  
 618 work for different processing stages along the early visual  
 619 pathway (and potentially other modalities, e.g., sound).  
 620 This said, however, one needs to keep in mind that dif-  
 621 ferent stages along the visual pathway have different tasks  
 622 and constraints, and, thus, likely incorporate different ef-  
 623 ficient coding principles: For instance, the retinal hard-  
 624 ware is space-limited and has to encode visual features in  
 625 view of a bottleneck with limited bandwidth (optic nerve),

626 whereas the primary visual cortex has comparably abundant  
627 resources which might serve for accurate probability  
628 estimation for behavioral tasks, such as novelty detection  
629 (discussed in (24, 70)). It is also worth to note that different  
630 visual processing stages (such as primary visual cortex vs.  
631 higher visual areas, or adaptation of visual coding to different  
632 behavioral states) may benefit from the hybrid modeling  
633 to a different degree, as efficient coding approaches  
634 learn filters that may be more relevant to stimulus-related  
635 features, but not high-level behavior goals (see discussion  
636 in (15)). Additionally, it would be interesting to compare  
637 our hybrid models with SI models regularized with other  
638 behavioral tasks such as object recognition (e.g., (11)) or  
639 predator detection (see above) for neural predictions along  
640 the ventral visual stream.

641 There is a long tradition of using SI models (reviewed in  
642 (3)) in predicting the responses of neurons to a great variety  
643 of stimuli (e.g., (2, 4, 18, 19, 71, 72)). Our results  
644 demonstrate how the EC hypothesis can be successfully  
645 leveraged as normative regularization for the identification  
646 of neural response properties. More generally, using EC  
647 as a flexible tool to impose regularization on modeling,  
648 the hybrid framework offers an opportunity to test different  
649 coding principles and unsupervised learning objectives  
650 with regards to experimental data for understanding neuronal  
651 processing.

## 652 **Materials and Methods**

### 653 **Animal procedures and retinal activity recordings.**

654 **Animal procedures.** All animal procedures were performed  
655 in accordance with the law governing animal protection  
656 issued by the German Federal Government (Tierschutzgesetz),  
657 approved by the governmental review board (Regierungspräsidium  
658 Tübingen, Baden-Württemberg, Konrad-Adenauer-Str. 20,  
659 72072 Tübingen, Germany). We used  $n=5$ , 5-9 weeks old  
660 female C57BL/6 mice (wild-type; JAX 000664, Jackson  
661 Laboratory, USA). Due to the exploratory nature of our  
662 study, we did not use any statistical methods to predetermine  
663 sample size, nor did we perform blinding or randomization.

665 Animals were housed under a standard light-dark  
666 (12h:12h) cycle. All procedures were carried out under  
667 very dim red illumination ( $>650$  nm). Prior to the start  
668 of the experiment, animals were dark-adapted for  $\geq 1$  h,  
669 then anesthetized with isoflurane (Baxter, Germany), and  
670 killed by cervical dislocation.

671 The eyes were enucleated and hemisected in carboxy-  
672 genated (95% O<sub>2</sub>, 5% CO<sub>2</sub>) artificial cerebrospinal fluid  
673 (ACSF) solution containing (in mM): 125 NaCl, 2.5 KCl,  
674 2 CaCl<sub>2</sub>, 1 MgCl<sub>2</sub>, 1.25 NaH<sub>2</sub>PO<sub>4</sub>, 26 NaHCO<sub>3</sub>, 20 glucose,  
675 and 0.5 l-glutamine (pH 7.4). Next, the retina was  
676 flat-mounted onto an Anodisc (#13, 0.2  $\mu$ m pore size,  
677 GE Healthcare, Germany) with the ganglion cell layer  
678 (GCL) facing up. To uniformly label the GCL cells,  
679 bulk electroporation was performed with the fluorescent

680 Ca<sup>2+</sup> indicator Oregon-Green BAPTA-1 (OGB-1; Invitrogen,  
681 Germany), as described earlier (44, 73), using 4-mm  
682 plate electrodes (CUY700P4E/L, Xceltis, Germany) and 9  
683 pulses ( $\sim 9.2$  V, 100 ms pulse width at 1 Hz). After  
684 electroporation, the tissue was immediately moved to the  
685 microscope's recording chamber, where it was continuously  
686 perfused with carboxygenated ACSF at  $\sim 36^\circ\text{C}$  and left  
687 to recover for  $\sim 30$  min before recordings started. Additionally,  
688 Sulforhodamine-101 (SR101, Invitrogen, Germany) was  
689 added to the ACSF ( $\sim 0.1$   $\mu$ M final concentration) to  
690 visualize blood vessels and identify damaged cells.

691 **Two-photon Ca<sup>2+</sup> recordings and light stimulation.** We  
692 recorded light stimulus-evoked Ca<sup>2+</sup> signals in GCL cells  
693 of the explanted mouse retina using a MOM-type two-  
694 photon (2P) microscope (74, 75) from Sutter Instruments  
695 (purchased from Science Products, Germany), as described  
696 earlier (43, 44). In brief, the microscope was powered  
697 by a mode-locked Ti: Sapphire laser (MaiTai-HP DeepSee,  
698 Newport Spectra-Physics, Germany) at 927 nm. Two  
699 detection pathways allowed simultaneously recording  
700 of OGB-1 and SR101 fluorescence (HQ 510/84 and HQ  
701 630/60, respectively; both Chroma/AHF, Germany) through  
702 a 16x water immersion objective (CFI75 LWD $\times$ 16/0.8W,  
703 DIC N2, Nikon, Germany). A custom-written software  
704 (ScanM, by M. Müller and T.E.) running under IGOR  
705 Pro 6.3 for Windows (Wavemetrics, USA) was used to  
706 acquire time-lapsed (64x64 pixels) image scans at a  
707 frame rate of 7.8125 Hz. Higher resolution images were  
708 acquired using 512x512 pixel scans. Additionally, to register  
709 the scan field positions, the outline of the retina and the  
710 optic disc were traced.

711 The retinas were presented with color noise stimulus  
712 using a visual stimulator tuned to the spectral sensitivities  
713 of mice (76). This stimulus consisted of independent  
714 binary dense noise (28x28 pixel frames, each pixel covering  
715  $(0.83^\circ)^2$  of visual angle) in the UV and green stimulator  
716 channels at 5 or 30 Hz. The stimulus contained 5 different  
717 training sequences (96 s each) interspersed with 6 repeats  
718 of a 10 s test sequence (Suppl. Fig. S1a).

719 In total, we used three data sets for modeling: (i) responses  
720 of  $n=96$  GCL neurons to 5-Hz noise recorded in dorsal  
721 retina ( $n=2$  eyes); (ii) responses of  $n=427$  GCL  
722 neurons to 5-Hz noise recorded ventrally ( $n=5$  eyes); in  
723 this dataset, we also presented two other stimuli: a full-  
724 field chirp (700  $\mu$ m in diameter) and a moving bar stimulus  
725 (300x1,000  $\mu$ m bright bar moving at 8 directions at 1  
726 mm/s). The responses to these latter stimuli were used to  
727 functionally classify the recorded GCL neurons (43). (iii)  
728  $n=64$  GCL neurons to 30-Hz noise recorded ventrally ( $n=2$   
729 eyes). Note that all cell numbers are after quality control  
730 (see below).

731 **Data preprocessing and analysis.** For each cell, we  
732 calculated a quality index ( $QI$ , with  $0 \leq QI \leq 1$ ) for its  
733 responses to each stimulus type as follows:

$$734 \quad QI = \text{Var}[E[C]_r]_t / E[\text{Var}[C]_t]_r \quad (1)$$

734 where  $C$  is a  $t$ -by- $r$  response matrix (time samples,  $t$ , by  
 735 repetitions,  $r$ ). The higher  $QI$ , the more reliable the re-  
 736 sponse and the higher the signal-to-noise ratio. For the  
 737 noise stimulus,  $QI_{noise}$  was determined based on the test  
 738 sequence responses. For the following analysis, we only  
 739 used cells with  $QI_{noise} > 0.25$ ; in case chirp and moving  
 740 bar responses were also recorded, neurons had to fulfill  
 741  $QI_{chirp} > 0.35$  or  $QI_{bar} > 0.6$  to be included.

742 In case of the noise stimulus, we preprocessed each cell's  
 743  $Ca^{2+}$  signal by Z-normalizing the raw traces and matching  
 744 sampling frequency of the recording (7.8125 Hz) to the  
 745 stimulus frequency (5 or 30 Hz) via linear interpolation.  
 746 Then, the traces were detrended using a high-pass filter  
 747 ( $> 0.1$  Hz) and their 1<sup>st</sup> order derivatives were calculated,  
 748 with negative values set to zero. We used the average of  
 749 a cell's responses to the 6 test sequence repeats as ground  
 750 truth. Excluding the test sequences, we had per cell a total  
 751 of 480 s of data, of which we used 440 s ( $\sim 91\%$ ) for  
 752 training and the remaining 40 s ( $\sim 9\%$ ) for validation (i.e.,  
 753 to pick the hyperparameters of the SI model, see below).

754 For chirp and moving bar responses, we first detrended the  
 755 traces and then normalized them to  $[0, 1]$  (44). Using these  
 756 responses, the cells were classified to different functional  
 757 groups (43) using RGC type classifier (see below).

758 To estimate the directional tuning from the moving bar re-  
 759 sponses, we first performed singular value decomposition  
 760 (SVD) on the mean response matrix, resulting in a tempo-  
 761 ral and a directional component. We then summed the  
 762 directional vectors in 2D planes and used the resulting vec-  
 763 tor length as direction selectivity index. Next, by shuffling  
 764 trial labels and computing the tuning curve for 1,000 times  
 765 (permutation test), we got the null distribution (no direc-  
 766 tional tuning). The percentile of true vector length was  
 767 used as p-value of directional tuning (43). Here, we con-  
 768 sidered cells with  $p < 0.05$  as direction-selective (DS) and  
 769 the remaining ones as non-DS.

770 **RGC type classifier.** To predict the functional type of GCL  
 771 cells, we used a Random Forest Classifier (RFC; (77)),  
 772 which was trained on a published mouse dataset (43).  
 773 In that study, features were extracted from the responses  
 774 to different visual stimuli (e.g., chirp and moving bar)  
 775 and used to cluster GCL cells into 32 RGC types and  
 776 14 additional dAC types. Here, we learned a mapping  
 777  $f$  from response features (20 features from responses to  
 778 chirp,  $\phi_{chirp}$  and 8 features from responses to moving  
 779 bar stimulus,  $\phi_{mb}$ ) and two additional parameters  $\Theta =$   
 780  $\{\theta_{soma}, \theta_{DS}\}$  to functional cell type labels  $L$  by training  
 781 a RFC for the dataset from (43):

$$777 \quad f : (\phi_{chirp}, \phi_{bar}, \Theta) \mapsto L \quad (2)$$

782 where  $\theta_{soma}$  denotes soma size to distinguish between al-  
 783 pha and non-alpha RGC types and  $\theta_{DS}$  denotes p-value of  
 784 permutation test for direction selectivity to distinguish be-  
 785 tween DS and non-DS RGC types.

786 We fit the RFC on a subset of data from (43) and val-  
 787 idated its performance on a held-out test dataset. The

788 classifier had a prediction accuracy of  $\sim 76\%$  on a held-  
 789 out test dataset (Suppl. Fig. S5). To apply the trained  
 790 classifier to our newly recorded dataset, we projected the  
 791 RGC responses (normalized to  $[-1, 1]$ ) into the feature  
 792 space described in (43) by computing the dot product be-  
 793 tween the response and the feature matrices. We used  
 794 the RFC implementation provided by the python package  
 795 `scikit-learn` (78) to train the classifier.

## 796 2D models.

797 **Stand-alone SI model (2D).** As baseline model to predict  
 798 the responses of neurons to the noise stimulus, we em-  
 799 ployed a stand-alone SI model (supervised learning), in  
 800 which we used factorized spatial and temporal convolu-  
 801 tional filters (Fig. 2a; (79, 80)). This SI model consisted  
 802 of one spatial convolutional layer ( $16 \times 2 \times 1 \times 9 \times 9$ , output  
 803 channels  $\times$  input channels  $\times$  depth  $\times$  image width  $\times$  image  
 804 height), one temporal convolutional layer ( $16 \times 16 \times 8 \times 1 \times 1$ ,  
 805 with 8 stimulus frames preceding an event), and — af-  
 806 ter flattening the spatial dimension — one fully connected  
 807 layer (FC;  $96 \times 6,400$ , output  $\times$  input channels), followed by  
 808 an exponential function. No padding was used. The loss  
 809 function was defined as:

$$809 \quad L_{SI} = \sum_i (\vec{r}_i - \vec{r}_i \log \vec{r}_i) + \alpha_1 \|\vec{w}_{cs}\|_2 \quad (3)$$

$$810 \quad + \alpha_2 \|\vec{w}_{ct}\|_2 + \beta \|\vec{w}_f\|_1$$

810 Here, the first term is the Poisson loss between predicted  
 811 responses ( $\vec{r}_i$ ) and ground truth ( $\vec{r}_i$ ) (with  $i$  denoting the  
 812 neuron index), the second term is the L2 penalty on the  
 813 weights of the spatial convolutional filters ( $\vec{w}_{cs}$ ) with hy-  
 814 perparameter  $\alpha_1$ , the third term is the L2 penalty on the  
 815 weights of temporal convolutional filters ( $\vec{w}_{ct}$ ) with hyper-  
 816 parameter  $\alpha_2$ , and the last term is the L1 penalty on the FC  
 817 layer ( $\vec{w}_f$ ) with hyperparameter  $\beta$ .

818 After performing a grid search for the three hyperparam-  
 819 eters, we picked  $\alpha_1 = 10, \alpha_2 = 10, \beta = 1/16$  which yielded  
 820 the best performance on the validation data. After train-  
 821 ing, we estimated the neurons' spatio-temporal RF filters  
 822 by computing gradients for each neuron, starting with a  
 823 blank image sequence as input. These gradients represent  
 824 the first-order approximation of the input that maximizes  
 825 the neuron's activation (6). For visualization, we extracted  
 826 the spatial and temporal RFs via SVD.

827 As a metric of biological plausibility, we calculated the co-  
 828 efficient of determination (R-squared;  $[0, 1]$ ) of fitting 2D  
 829 Gaussian distributions to the spatial (component of) the  
 830 convolutional filters. We set the R-squared value to 0 if  
 831 the sigma of the fitted Gaussian was larger than the size  
 832 of the filter (i.e., 9 pixels). We calculated this fit qual-  
 833 ity for the filter of the chromatic channel with the domi-  
 834 nant response. Because the mouse retina is divided into a  
 835 more green-sensitive dorsal and a more UV-sensitive ven-  
 836 tral retina (e.g., (44)), this meant that for dorsal neurons  
 837 we only determined the R-squared for filters for the green

838 stimulus channel, and for ventral neurons for the UV stim-  
839 ulus channel.

840 **SI-PCA model (2D).** The spatial convolutional filters of the  
841 SI-PCA model were composed from PCA basis functions  
842 ( $W$ ). The model was trained to learn the weights of these  
843 basis functions. The filters were produced by performing  
844 PCA transformation on natural images recorded in mouse  
845 habitats (38):

$$W = U^T \quad (4)$$

846 where  $U$  contains the eigenvectors of the covariance matrix  
847 of the centered data in each column.

848 For example, when using 4 PCA bases, the shape of learn-  
849 able weight matrix was 16x4 (channel number x basis  
850 number), the shape of PCA bases was 4x2x1x9x9 (basis  
851 number x chromatic channel x depth x image width x im-  
852 age height), and the resulted spatial filter had the shape of  
853 16x2x1x9x9. We varied the number of used basis (hyper-  
854 parameter) and selected the one which achieved the best  
855 performance on validation data (Suppl. Fig. S1b; Suppl.  
856 Fig. S3b).

857 **SI-DCT model (2D).** For the SI-DCT model, its spatial con-  
858 volutional filters were composed from DCT basis func-  
859 tions, which were defined as:

$$F(u, v) = \alpha(u)\alpha(v) \cos\left[\frac{(2i+1)\pi}{2N}u\right] \cos\left[\frac{(2j+1)\pi}{2N}v\right] \quad (5)$$

$$\alpha(u) = \begin{cases} \sqrt{\frac{1}{N}} & u = 0 \\ \sqrt{\frac{2}{N}} & u \neq 0 \end{cases} \quad (6)$$

$$\alpha(v) = \begin{cases} \sqrt{\frac{1}{N}} & v = 0 \\ \sqrt{\frac{2}{N}} & v \neq 0 \end{cases} \quad (7)$$

860 where  $i$  and  $j$  denote pixel index of the input image (size  
861  $(N, N)$ );  $u$  and  $v$  denote DCT coefficient index of the DCT  
862 filter. Here, we employed DCT basis functions for one-  
863 channel gray images and thus used different bases for each  
864 chromatic channel. For example, when using 4 DCT bases,  
865 the shape of learnable weight matrix was 16x4x2 (channel  
866 number x basis number x chromatic channel), the shape of  
867 basis function was 4x1x9x9 (basis number x depth x image  
868 width x image height), and the resulted spatial filter had  
869 the shape of 16x2x1x9x9. Like for SI-PCA, we varied the  
870 number of used basis and picked the one which achieved  
871 the best performance on validation data (Suppl. Fig. S1b).

872 **Stand-alone EC model (2D).** We used a similar EC model  
873 architecture (convolutional autoencoder) and loss function  
874 as in (38). The model's encoder contained a single con-  
875 volutional layer (with weights denoted  $\vec{w}_c$ ) followed by a  
876 rectified linear unit (ReLU) function, one FC layer, and  
877 another ReLU function. The decoder contained one FC  
878 layer, one ReLU function, a single deconvolutional layer  
879 (with weights denoted  $\vec{w}_d$ ), and a hyperbolic tangent (tanh)

880 function to map back to the original data range ( $[-1, 1]$ ).

881 As a measure of reconstruction quality, we used mean  
882 squared error (MSE; (37, 38)). Gaussian noise was added  
883 to the encoder output for redundancy reduction (37, 81, 82)  
884 and an L1 penalty (hyperparameter  $\beta$ ) was imposed to its  
885 activation ( $\vec{h}$ ) for sparse readouts (37, 81, 83). We also ap-  
886 plied L2 regularization on the convolutional and deconvol-  
887 utional layers to encourage the learning of smooth filters  
888 (42, 84, 85). We used 16 9x9 convolutional and deconvol-  
889 utional filters. The activation tensor (16x28x28, out-  
890 put channel x image width x image height) following the  
891 first convolutional layer was flattened to a one-dimensional  
892 vector with 12,544 inputs before feeding into the FC layer.  
893 The loss function for the EC model was:

$$L_{EC} = \sum_i (\vec{x}_i - \hat{\vec{x}}_i)^2 + \alpha(\|\vec{w}_c\|_2 + \|\vec{w}_d\|_2) + \beta\|\vec{h}\|_1 \quad (8)$$

894 where the first term is the MSE error between the predic-  
895 tion  $\hat{\vec{x}}_i$  and ground truth  $\vec{x}_i$  with image index  $i$ , and the  
896 next two terms denote the L2 and L1 penalties.

897 **Hybrid model (2D).** The hybrid (semi-supervised) model  
898 consisted of a SI and an EC branch (for details on the two  
899 models' architectures, see above). These branches were  
900 trained simultaneously, sharing the spatial convolutional  
901 filters ( $\vec{w}_{cs}$ ). The total loss function of the hybrid model  
902 was derived from the loss functions of the two branches as  
903 follows:

$$L_{Hybrid} = wL_{SI} + (1-w)L_{EC} \quad (9)$$

$$L_{SI} = \left( \sum_i (\vec{r}_i - \hat{\vec{r}}_i \log \hat{\vec{r}}_i) + \alpha_1 \|\vec{w}_{cs}\|_2 + \alpha_2 \|\vec{w}_{ct}\|_2 / w \right. \\ \left. + \beta_1 \|\vec{w}_f\|_1 / w \right) / N_1 \quad (10)$$

$$L_{EC} = \left( \sum_j (\vec{x}_j - \hat{\vec{x}}_j)^2 + \alpha_3 \|\vec{w}_{cs}\|_2 + \alpha_3 \|\vec{w}_d\|_2 / (1-w) \right. \\ \left. + \beta_2 \|\vec{h}\|_1 / (1-w) \right) / N_2 \quad (11)$$

904 Here,  $i$  and  $j$  denote neuron and image index, respectively;  
905  $N_1$  and  $N_2$  the number of neurons and images, respec-  
906 tively. The weight ( $w$ , with  $0 \leq w \leq 1$ ) controlled the  
907 impact of each branch's loss function on the shared spa-  
908 tial filters. Practically, we used  $w = 10^{-8}$  for  $L_{SI}$  and  
909  $w = (1 - 10^{-8})$  for  $L_{EC}$  when  $w = 0$  and  $w = 1$ , respec-  
910 tively. Note that we added  $w$  to the denominator of the last  
911 two terms to maintain the same regularization for  $\vec{w}_{ct}$  and  
912  $\vec{w}_f$  in a stand-alone SI model when varying  $w$ . For  $L_{EC}$ ,  
913 similar to  $L_{SI}$ , we added  $(1-w)$  to the denominator of  
914 the last two terms to keep the same regularization for  $\vec{w}_d$   
915 and  $\vec{h}$  in a stand-alone EC model when varying  $w$ . We  
916 used different data to train the EC branch of the hybrid  
917 model: natural images, phase-scrambled natural images  
918 and noise. All hybrid models were trained for a maximum

of 100 epochs (Suppl. Fig. S1c,d); training was stopped early when the validation loss started decreasing.

Tuning all hyperparameters jointly in a grid search was computationally prohibitive. Hence, for the SI branch, we varied the hyperparameters around those determined for the stand-alone configuration ( $\alpha_1 = 10, \alpha_2 = 10, \beta_1 = 1/16$ ; see above), while for the EC branch, we varied the hyperparameters systematically around the values ( $\alpha_3 = 10^3, \beta_2 = 1/16$ ) used in (38). To tune  $w$ , we devised a linear search approach by normalizing the loss functions (using  $N_1$  and  $N_2$ ).

After training the hybrid model, we estimated the spatio-temporal RFs of all neurons using a gradient ascent algorithm (6). We visualized the spatial and temporal component of RFs using SVD (cf. Fig. 3b), and the magnitude of the RF was indicated in the spatial component.

We trained 2D models using all training data (440 s) with a learning rate of  $\mu = 10^{-4}$ . In case less data were used (i.e., to evaluate data efficiency), we kept all hyperparameters the same as for the full data case but doubled the learning rate. This was done because the stand-alone SI model and the hybrid model could not reach the minimum of validation loss within 100 epochs (when less data were used).

### 3D models.

**Stand-alone SI model (3D).** The 3D SI model consisted of one spatio-temporal convolutional layer (16x2x8x9x9, output channels x input channels x depth x image width x image height; depth varied with the frequency of noise stimuli,  $n=8$  and  $n=30$  for 5-Hz and 30-Hz noise, respectively), and — after flattening all dimension — one FC layer (96x6,400, output channels x input channels; output channel varied with cell numbers  $n=96, 64$  or 427 for different data sets; see above), followed by an exponential function. No padding was used. The loss function was defined as:

$$L_{SI} = \sum_i (\hat{r}_i - \vec{r}_i \log \hat{r}_i) + \alpha \|\vec{w}_c\|_2 + \beta \|\vec{w}_f\|_1 \quad (12)$$

This equation differs from Equation () with respect to the L2 penalty, which is here on the weights of the spatio-temporal convolutional filters ( $\vec{w}_c$ ) with hyperparameter  $\alpha$  for the second term. After performing a grid search for the two hyperparameters, we picked  $\alpha = 100, \beta = 1/4$  which yielded the best performance on the validation data. After training, we estimated and extracted the cells' spatial and temporal RFs via SVD for visualization.

**SI-PCA model (3D).** For the 3D SI-PCA models, we applied Equation () to the movie clips (2x8x9x9, chromatic channel x depth x image width x image height; depth varied with the frequency of noise stimuli,  $n=8$  and  $n=30$  for 5-Hz and 30-Hz noise, respectively). Like for 2D SI-PCA models, we varied the number of used bases and picked the number for which the model achieved the best performance on the validation data (Suppl. Fig. S3a).

**Stand-alone EC model (3D).** The 3D EC models used a sequence of frames from a movie clip as input and featured 3D spatio-temporal convolutional layers (with weights denoted  $\vec{w}_c$ ) in the encoder. The decoder contained deconvolutional layers with weights  $\vec{w}_d$ . In the past-encoding case, we fed an 8-frame clip (frames at  $t-7$  to  $t$ ) to the model and aimed at reconstructing the 7<sup>th</sup> frame (at  $t-1$ ). In the future-prediction case, the goal was to predict the 8<sup>th</sup> frame (at  $t$ ) with the input being the first 7 frames ( $t-7$  to  $t-1$ ) of the clip. The loss functions was similar to that given by Equation () except that (i)  $\vec{w}_c$  features different a shape (16x2x8x9x9, output channel x chromatic channel x filter depth x filter width x filter height), and (ii)  $x_i$  denotes the 7<sup>th</sup> frame for the past encoding and the 8<sup>th</sup> frame for the future prediction model (Suppl. Fig. S2b,c,d).

**Hybrid model (3D).** The 3D hybrid models consisted of a SI branch and an EC branch with shared spatio-temporal convolutional filters ( $\vec{w}_c$ ; see above). Like for the 2D hybrid models, the total loss function was a weighted sum of losses for the two branches as follows:

$$L_{Hybrid} = wL_{SI} + (1-w)L_{EC} \quad (13)$$

$$L_{SI} = \left( \sum_i (\hat{r}_i - \vec{r}_i \log \hat{r}_i) + \alpha_1 \|\vec{w}_c\|_2 + \beta_1 \|\vec{w}_f\|_1 / w \right) / N_1 \quad (14)$$

$$L_{EC} = \left( \sum_j (\hat{x}_j - \vec{x}_j)^2 + \alpha_2 \|\vec{w}_c\|_2 + \alpha_2 \|\vec{w}_d\|_2 / (1-w) + \beta_2 \|\vec{h}\|_1 / (1-w) \right) / N_2 \quad (15)$$

Here,  $i$  denotes neuron index,  $j$  movie clip index,  $N_1$  neuron number, and  $N_2$  the number of movie clips. Again, instead of tuning all hyperparameters jointly via a grid search, we varied the hyperparameters around the values determined for the stand-alone SI configuration ( $\alpha_1 = 100, \beta_1 = 1/4$ ) for the SI branch. For the EC branch, we varied the hyperparameters systematically around the values ( $\alpha_2 = 10^4, \beta_2 = 1/16$ ) used in the stand-alone EC models. We then tuned  $w$  linearly after normalizing the loss functions (using  $N_1$  and  $N_2$ ). We also visualized the spatial and temporal RF components using SVD (Fig. 5a, bottom).

### Acknowledgments

We thank Matthew Chalk, Dylan Paiton and Katrin Franke for helpful discussions, and Merle Harrer for excellent technical assistance. This work was supported by the German Research Foundation (DFG): SFB 1233, Robust Vision: Inference Principles and Neural Mechanisms, projects 10 and 12, project number: 276693517; and under Germany's Excellence Strategy EXC 2064/1 (project number 390727645); the European Union's Horizon 2020 research and innovation programme under the Marie Skłodowska-Curie grant (agreement No 674901);

1013 the Max Planck Society (M.FE.A.KYBE0004); and the  
1014 German Ministry of Education and Research (BMBF;  
1015 FKZ: 01GQ1002), and the Tübingen AI Center (FKZ:  
1016 01IS18039A). The funders had no role in study design,  
1017 data collection and analysis, decision to publish, or prepara-  
1018 tion of the manuscript.

## 1019 Author Contributions

1020 Conceptualization: Y.Q.; Methodology: Y.Q., D.K., K.S.,  
1021 D.G., L.H., T.S., and T.E.; Data acquisition & curation:  
1022 K.S.; Formal analysis: Y.Q. with input from D.K., M.B.,  
1023 L.B., and T.E.; Investigation: Y.Q. with input from D.K.,  
1024 K.S., L.B., M.B., and T.E.; Writing – original Draft: Y.Q.,  
1025 D.K., L.B., and T.E.; Writing – review & editing: all au-  
1026 thors; Visualization: Y.Q.; D.G. (confusion matrix); Soft-  
1027 ware: Y.Q.; L.H. and D.G. (classifier); Resources: T.S. and  
1028 T.E.; Supervision: M.B., L.B., and T.E.; Funding acquisi-  
1029 tion: L.B., M.B., and T.E.

## 1030 Declaration of Interests

1031 The authors declare no competing interests.

## 1032 Data and Code Availability

1033 Data and code would be available upon publication.

## 1034 Bibliography

- 1035 1. Ian H Stevenson and Konrad P Kording. How advances in neural recording affect data  
1036 analysis. *Nature neuroscience*, 14(2):139–142, 2011.
- 1037 2. EJ Chichilnisky. A simple white noise analysis of neuronal light responses. *Network:  
1038 Computation in Neural Systems*, 12(2):199–213, 2001.
- 1039 3. Michael C-K Wu, Stephen V David, and Jack L Gallant. Complete functional character-  
1040 ization of sensory neurons by system identification. *Annu. Rev. Neurosci.*, 29:477–505,  
1041 2006.
- 1042 4. Jonathan W Pillow, Jonathon Shlens, Liam Paninski, Alexander Sher, Alan M Litke,  
1043 EJ Chichilnisky, and Eero P Simoncelli. Spatio-temporal correlations and visual sig-  
1044 nalling in a complete neuronal population. *Nature*, 454(7207):995–999, 2008.
- 1045 5. Vasilis Marmarelis. *Analysis of physiological systems: The white-noise approach*.  
1046 Springer Science & Business Media, 2012.
- 1047 6. Melinda E Koelling and Duane Q Nykamp. Computing linear approximations to non-  
1048 linear neuronal response. *Network: Computation in Neural Systems*, 19(4):286–313,  
1049 2008.
- 1050 7. Tim Gollisch and Markus Meister. Eye smarter than scientists believed: neural compu-  
1051 tations in circuits of the retina. *Neuron*, 65(2):150–164, 2010.
- 1052 8. Esteban Real, Hiroki Asari, Tim Gollisch, and Markus Meister. Neural circuit inference  
1053 from function to structure. *Current Biology*, 27(2):189–198, 2017.
- 1054 9. Ben Willmore, Ryan J Prenger, Michael C-K Wu, and Jack L Gallant. The berkeley  
1055 wavelet transform: a biologically inspired orthogonal wavelet transform. *Neural compu-  
1056 tation*, 20(6):1537–1564, 2008.
- 1057 10. Niru Maheswaranathan, David B Kastner, Stephen A Baccus, and Surya Ganguli. In-  
1058 ferring hidden structure in multilayered neural circuits. *PLoS computational biology*, 14  
1059 (8):e1006291, 2018.
- 1060 11. Daniel LK Yamins, Ha Hong, Charles F Cadieu, Ethan A Solomon, Darren Seibert, and  
1061 James J DiCarlo. Performance-optimized hierarchical models predict neural responses  
1062 in higher visual cortex. *Proceedings of the National Academy of Sciences*, 111(23):  
1063 8619–8624, 2014.
- 1064 12. Umut Güçlü and Marcel AJ van Gerven. Deep neural networks reveal a gradient in  
1065 the complexity of neural representations across the ventral stream. *Journal of Neuro-  
1066 science*, 35(27):10005–10014, 2015.
- 1067 13. Yann LeCun, Yoshua Bengio, and Geoffrey Hinton. Deep learning. *nature*, 521(7553):  
1068 436–444, 2015.
- 1069 14. Demis Hassabis, Dharshan Kumaran, Christopher Summerfield, and Matthew  
1070 Botvinick. Neuroscience-inspired artificial intelligence. *Neuron*, 95(2):245–258, 2017.
- 1071 15. Maxwell H Turner, Luis Gonzalo Sanchez Giraldo, Odelia Schwartz, and Fred Rieke.  
1072 Stimulus- and goal-oriented frameworks for understanding natural vision. *Nature neuro-  
1073 science*, 22(1):15–24, 2019.
- 1074 16. Blake A Richards, Timothy P Lillicrap, Philippe Beaudoin, Yoshua Bengio, Rafal Bogacz,  
1075 Amelia Christensen, Claudia Clopath, Rui Ponte Costa, Archy de Berker, Surya Ganguli,  
1076 et al. A deep learning framework for neuroscience. *Nature neuroscience*, 22(11):1761–  
1077 1770, 2019.

- 1078 17. Daniel LK Yamins and James J DiCarlo. Using goal-driven deep learning models to  
1079 understand sensory cortex. *Nature neuroscience*, 19(3):356–365, 2016.
- 1080 18. Lane McIntosh, Niru Maheswaranathan, Aran Nayebi, Surya Ganguli, and Stephen Bac-  
1081 cus. Deep learning models of the retinal response to natural scenes. *Advances in neural  
1082 information processing systems*, 29:1369–1377, 2016.
- 1083 19. David Klindt, Alexander S Ecker, Thomas Euler, and Matthias Bethge. Neural system  
1084 identification for large populations separating “what” and “where”. In *Advances in Neural  
1085 Information Processing Systems*, pages 3506–3516, 2017.
- 1086 20. Pouya Bashivan, Kohitij Kar, and James J DiCarlo. Neural population control via deep  
1087 image synthesis. *Science*, 364(6439), 2019.
- 1088 21. Carlos R Ponce, Will Xiao, Peter F Schade, Till S Hartmann, Gabriel Kreiman, and  
1089 Margaret S Livingstone. Evolving images for visual neurons using a deep generative  
1090 network reveals coding principles and neuronal preferences. *Cell*, 177(4):999–1009,  
1091 2019.
- 1092 22. Edgar Y Walker, Fabian H Sinz, Erick Cobos, Taliah Muhammad, Emmanouil  
1093 Froudarakis, Paul G Fahey, Alexander S Ecker, Jacob Reimer, Xaq Pitkow, and An-  
1094 dreas S Tolia. Inception loops discover what excites neurons most using deep predic-  
1095 tive models. *Nature neuroscience*, 22(12):2060–2065, 2019.
- 1096 23. Tom Baden, Thomas Euler, and Philipp Berens. Understanding the retinal basis of  
1097 vision across species. *Nature Reviews Neuroscience*, 21(1):5–20, 2020.
- 1098 24. Horace B Barlow et al. Possible principles underlying the transformation of sensory  
1099 messages. *Sensory communication*, 1(01), 1961.
- 1100 25. Eero P Simoncelli and Bruno A Olshausen. Natural image statistics and neural repre-  
1101 sentation. *Annual review of neuroscience*, 24(1):1193–1216, 2001.
- 1102 26. Eugene Switkes, Melanie J Mayer, and Jeffrey A Sloan. Spatial frequency analysis of  
1103 the visual environment: Anisotropy and the carpentered environment hypothesis. *Vision  
1104 research*, 18(10):1393–1399, 1978.
- 1105 27. Xiangmin Xu, Christine E Collins, Ilya Khaytin, Jon H Kaas, and Vivien A Casagrande.  
1106 Unequal representation of cardinal vs. oblique orientations in the middle temporal visual  
1107 area. *Proceedings of the National Academy of Sciences*, 103(46):17490–17495, 2006.
- 1108 28. Ahna R Girshick, Michael S Landy, and Eero P Simoncelli. Cardinal rules: visual orien-  
1109 tation perception reflects knowledge of environmental statistics. *Nature neuroscience*,  
1110 14(7):926–932, 2011.
- 1111 29. Simon Laughlin. A simple coding procedure enhances a neuron’s information capacity.  
1112 *Zeitschrift für Naturforschung c*, 36(9-10):910–912, 1981.
- 1113 30. J Hans van Hateren and Dan L Ruderman. Independent component analysis of natural  
1114 image sequences yields spatio-temporal filters similar to simple cells in primary visual  
1115 cortex. *Proceedings of the Royal Society of London. Series B: Biological Sciences*, 265  
1116 (1412):2315–2320, 1998.
- 1117 31. Suva Roy, Na Young Jun, Emily L Davis, John Pearson, and Greg D Field. Inter-mosaic  
1118 coordination of retinal receptive fields. *Nature*, 592(7854):409–413, 2021.
- 1119 32. Joseph J Atick and A Norman Redlich. Towards a theory of early visual processing.  
1120 *Neural computation*, 2(3):308–320, 1990.
- 1121 33. Joseph J Atick. Could information theory provide an ecological theory of sensory pro-  
1122 cessing? *Network: Computation in neural systems*, 3(2):213–251, 1992.
- 1123 34. Christina Enroth-Cugell and John G Robson. The contrast sensitivity of retinal ganglion  
1124 cells of the cat. *The Journal of physiology*, 187(3):517–552, 1966.
- 1125 35. Dana H Ballard. Modular learning in neural networks. In *AAAI*, pages 279–284, 1987.
- 1126 36. Geoffrey E Hinton and Ruslan R Salakhutdinov. Reducing the dimensionality of data  
1127 with neural networks. *science*, 313(5786):504–507, 2006.
- 1128 37. Samuel Ocko, Jack Lindsey, Surya Ganguli, and Stephane Deny. The emergence of  
1129 multiple retinal cell types through efficient coding of natural movies. In *Advances in  
1130 Neural Information Processing Systems*, pages 9389–9400, 2018.
- 1131 38. Yongrong Qiu, Zhijian Zhao, David Klindt, Magdalena Kautzky, Klaudia P Szatko, Frank  
1132 Schaeffel, Katharina Rifai, Katrin Franke, Laura Busse, and Thomas Euler. Natural  
1133 environment statistics in the upper and lower visual field are reflected in mouse retinal  
1134 specializations. *Current Biology*, 2021.
- 1135 39. Dylan M Paiton, Charles G Frye, Sheng Y Lundquist, Joel D Bowen, Ryan Zarcow, and  
1136 Bruno A Olshausen. Selectivity and robustness of sparse coding networks. *Journal of  
1137 Vision*, 20(12):10–10, 2020.
- 1138 40. Jan Eichhorn, Fabian Sinz, and Matthias Bethge. Natural image coding in v1: how much  
1139 is orientation selectivity? *PLoS computational biology*, 5(4):e1000336, 2009.
- 1140 41. Wiktor Młynarski, Michal Hledik, Thomas R Sokolowski, and Gašper Tkačič. Statistical  
1141 analysis and optimality of neural systems. *Neuron*, 109(7):1227–1241, 2021.
- 1142 42. Benjamin T Vincent and Roland J Baddeley. Synaptic energy efficiency in retinal pro-  
1143 cessing. *Vision research*, 43(11):1285–1292, 2003.
- 1144 43. Tom Baden, Philipp Berens, Katrin Franke, Miroslav Román Rosón, Matthias Bethge,  
1145 and Thomas Euler. The functional diversity of retinal ganglion cells in the mouse. *Nature*,  
1146 529(7586):345–350, 2016.
- 1147 44. Klaudia P Szatko, Maria M Korympidou, Yanli Ran, Philipp Berens, Deniz Dalkara, Timm  
1148 Schubert, Thomas Euler, and Katrin Franke. Neural circuits in the mouse retina support  
1149 color vision in the upper visual field. *Nature communications*, 11(1):1–14, 2020.
- 1150 45. Cassandra L Schlamp, Angela D Montgomery, Caitlin E Mac Nair, Claudia Schuart,  
1151 Daniel J Willmer, and Robert W Nickells. Evaluation of the percentage of ganglion cells  
1152 in the ganglion cell layer of the rodent retina. *Molecular vision*, 19:1387, 2013.
- 1153 46. Gerald H Jacobs, Gary A Williams, and John A Fenwick. Influence of cone pigment  
1154 coexpression on spectral sensitivity and color vision in the mouse. *Vision research*, 44  
1155 (14):1615–1622, 2004.
- 1156 47. Matthew D Zeiler and Rob Fergus. Visualizing and understanding convolutional net-  
1157 works. In *European conference on computer vision*, pages 818–833. Springer, 2014.
- 1158 48. Katrin Franke, Philipp Berens, Timm Schubert, Matthias Bethge, Thomas Euler, and  
1159 Tom Baden. Inhibition decorrelates visual feature representations in the inner retina.  
1160 *Nature*, 542(7642):439–444, 2017.
- 1161 49. Robert E Soodak. Two-dimensional modeling of visual receptive fields using gaussian  
1162 subunits. *Proceedings of the National Academy of Sciences*, 83(23):9259–9263, 1986.
- 1163 50. Rajesh PN Rao and Dana H Ballard. Predictive coding in the visual cortex: a functional

- 1164 interpretation of some extra-classical receptive-field effects. *Nature neuroscience*, 2(1):  
1165 79–87, 1999.
- 1166 51. Toshihiko Hosoya, Stephen A Baccus, and Markus Meister. Dynamic predictive coding  
1167 by the retina. *Nature*, 436(7047):71–77, 2005.
- 1168 52. Jamie Johnston, Sofie-Helene Seibel, Léa Simone Adele Darnet, Sabine Renninger,  
1169 Michael Orger, and Leon Lagnado. A retinal circuit generating a dynamic predictive  
1170 code for oriented features. *Neuron*, 102(6):1211–1222, 2019.
- 1171 53. J Hans van Hateren. Real and optimal neural images in early vision. *Nature*, 360(6399):  
1172 68–70, 1992.
- 1173 54. Joseph J Atick and A Norman Redlich. What does the retina know about natural  
1174 scenes? *Neural computation*, 4(2):196–210, 1992.
- 1175 55. Matthew Chalk, Olivier Marre, and Gašper Tkačik. Toward a unified theory of efficient,  
1176 predictive, and sparse coding. *Proceedings of the National Academy of Sciences*, 115  
1177 (1):186–191, 2018.
- 1178 56. Jerome Y Lettvin, Humberto R Maturana, Warren S McCulloch, and Walter H Pitts.  
1179 What the frog’s eye tells the frog’s brain. *Proceedings of the IRE*, 47(11):1940–1951,  
1180 1959.
- 1181 57. J Alexander Bae, Shang Mu, Jinseop S Kim, Nicholas L Turner, Ignacio Tartavull, Nico  
1182 Kemnitz, Chris S Jordan, Alex D Norton, William M Silversmith, Rachel Prentki, et al.  
1183 Digital museum of retinal ganglion cells with dense anatomy and physiology. *Cell*, 173  
1184 (5):1293–1306, 2018.
- 1185 58. Nicholas M Tran, Karthik Shekhar, Irene E Whitney, Anne Jacobi, Inbal Benhar, Gu-  
1186 osong Hong, Wenjun Yan, Xian Adiconis, McKinzie E Arnold, Jung Min Lee, et al.  
1187 Single-cell profiles of retinal ganglion cells differing in resilience to injury reveal neu-  
1188 roprotective genes. *Neuron*, 104(6):1039–1055, 2019.
- 1189 59. Jillian Goetz, Zachary F Jessen, Anne Jacobi, Adam Mani, Sam Cooler, Devon Greer,  
1190 Sabah Kadri, Jeremy Segal, Karthik Shekhar, Joshua Sanes, et al. Unified classifica-  
1191 tion of mouse retinal ganglion cells using function, morphology, and gene expression.  
1192 *Morphology, and Gene Expression*, 2021.
- 1193 60. Horace B Barlow and Richard M Hill. Selective sensitivity to direction of movement in  
1194 ganglion cells of the rabbit retina. *Science*, 139(3553):412–412, 1963.
- 1195 61. Fabian H Sinz, Alexander S Ecker, Paul G Fahey, Edgar Y Walker, Erick Cobos, Em-  
1196 manouil Froudarakis, Dimitri Yatsenko, Xaq Pitkow, Jacob Reimer, and Andreas S Tol-  
1197 lias. Stimulus domain transfer in recurrent models for large scale cortical population  
1198 prediction on video. *BioRxiv*, page 452672, 2018.
- 1199 62. Jon Touryan, Gidon Felsen, and Yang Dan. Spatial structure of complex cell receptive  
1200 fields measured with natural images. *Neuron*, 45(5):781–791, 2005.
- 1201 63. Andrew Saxe, Stephanie Nelli, and Christopher Summerfield. If deep learning is the  
1202 answer, what is the question? *Nature Reviews Neuroscience*, 22(1):55–67, 2021.
- 1203 64. Alexander Heitman, Nora Brackbill, Martin Greschner, Alexander Sher, Alan M Litke,  
1204 and EJ Chichilnisky. Testing pseudo-linear models of responses to natural scenes in  
1205 primate retina. *bioRxiv*, page 045336, 2016.
- 1206 65. Nicole C Rust and J Anthony Movshon. In praise of artifice. *Nature neuroscience*, 8  
1207 (12):1647–1650, 2005.
- 1208 66. Yifeng Zhang, In-Jung Kim, Joshua R Sanes, and Markus Meister. The most numerous  
1209 ganglion cell type of the mouse retina is a selective feature detector. *Proceedings of the  
1210 National Academy of Sciences*, 109(36):E2391–E2398, 2012.
- 1211 67. Horace B Barlow. Summation and inhibition in the frog’s retina. *The Journal of physi-  
1212 ology*, 119(1):69–88, 1953.
- 1213 68. Sophie Deneve and Matthew Chalk. Efficiency turns the table on neural encoding,  
1214 decoding and noise. *Current Opinion in Neurobiology*, 37:141–148, 2016.
- 1215 69. Michael Teit, Emily Meyer, and Garrett Kenyon. Can lateral inhibition for sparse coding  
1216 help explain v1 neuronal responses to natural stimuli? In *2020 IEEE South-west Sym-  
1217 posium on Image Analysis and Interpretation (SSIAI)*, pages 120–124. IEEE, 2020.
- 1218 70. Horace Barlow. Redundancy reduction revisited. *Network: computation in neural sys-  
1219 tems*, 12(3):241, 2001.
- 1220 71. Brett Vintch, J Anthony Movshon, and Eero P Simoncelli. A convolutional subunit model  
1221 for neuronal responses in macaque v1. *Journal of Neuroscience*, 35(44):14829–14841,  
1222 2015.
- 1223 72. Santiago A Cadena, George H Denfield, Edgar Y Walker, Leon A Gatys, Andreas S  
1224 Tolias, Matthias Bethge, and Alexander S Ecker. Deep convolutional models improve  
1225 predictions of macaque v1 responses to natural images. *PLoS computational biology*,  
1226 15(4):e1006897, 2019.
- 1227 73. Kevin L Briggman and Thomas Euler. Bulk electroporation and population calcium  
1228 imaging in the adult mammalian retina. *Journal of neurophysiology*, 105(5):2601–2609,  
1229 2011.
- 1230 74. Thomas Euler, Susanne E Hausselt, David J Margolis, Tobias Breuninger, Xavier  
1231 Castell, Peter B Detwiler, and Winfried Denk. Eyecup scope—optical recordings of light  
1232 stimulus-evoked fluorescence signals in the retina. *Pflügers Archiv-European Journal  
1233 of Physiology*, 457(6):1393–1414, 2009.
- 1234 75. Thomas Euler, Katrin Franke, and Tom Baden. Studying a light sensor with light: mul-  
1235 tiphoton imaging in the retina. In *Multiphoton Microscopy*, pages 225–250. Springer,  
1236 2019.
- 1237 76. Katrin Franke, André Maia Chagas, Zhijian Zhao, Maxime JY Zimmermann, Philipp  
1238 Bartel, Yongrong Qiu, Klaudia P Szatko, Tom Baden, and Thomas Euler. An arbitrary-  
1239 spectrum spatial visual stimulator for vision research. *elife*, 8:e48779, 2019.
- 1240 77. Leo Breiman. Random forests. *Machine learning*, 45(1):5–32, 2001.
- 1241 78. F Pedregosa, G. Varoquaux, A. Gramfort, V. Michel, B. Thirion, O. Grisel, M. Blon-  
1242 del, P. Prettenhofer, R. Weiss, V. Dubourg, J. Vanderplas, A. Passos, D. Cournapeau,  
1243 M. Brucher, M. Perrot, and E. Duchesnay. Scikit-learn: Machine learning in Python.  
1244 *Journal of Machine Learning Research*, 12:2825–2830, 2011.
- 1245 79. Lin Sun, Kui Jia, Dit-Yan Yeung, and Bertram E Shi. Human action recognition using  
1246 factorized spatio-temporal convolutional networks. In *Proceedings of the IEEE interna-  
1247 tional conference on computer vision*, pages 4597–4605, 2015.
- 1248 80. Du Tran, Heng Wang, Lorenzo Torresani, Jamie Ray, Yann LeCun, and Manohar Paluri.  
1249 A closer look at spatiotemporal convolutions for action recognition. In *Proceedings of  
the IEEE conference on Computer Vision and Pattern Recognition*, pages 6450–6459,  
2018.
81. Eizaburo Doi and Michael S Lewicki. A theory of retinal population coding. *Advances in  
neural information processing systems*, 19:353, 2007.
82. MCW Van Rossum, Brendan J O’Brien, and Robert G Smith. Effects of noise on the  
spike timing precision of retinal ganglion cells. *Journal of neurophysiology*, 89(5):2406–  
2419, 2003.
83. David J Field. What is the goal of sensory coding? *Neural computation*, 6(4):559–601,  
1994.
84. David H Hubel and Torsten N Wiesel. Receptive fields of single neurones in the cat’s  
striate cortex. *The Journal of physiology*, 148(3):574–591, 1959.
85. David Marr and Ellen Hildreth. Theory of edge detection. *Proceedings of the Royal  
Society of London. Series B. Biological Sciences*, 207(1167):187–217, 1980.

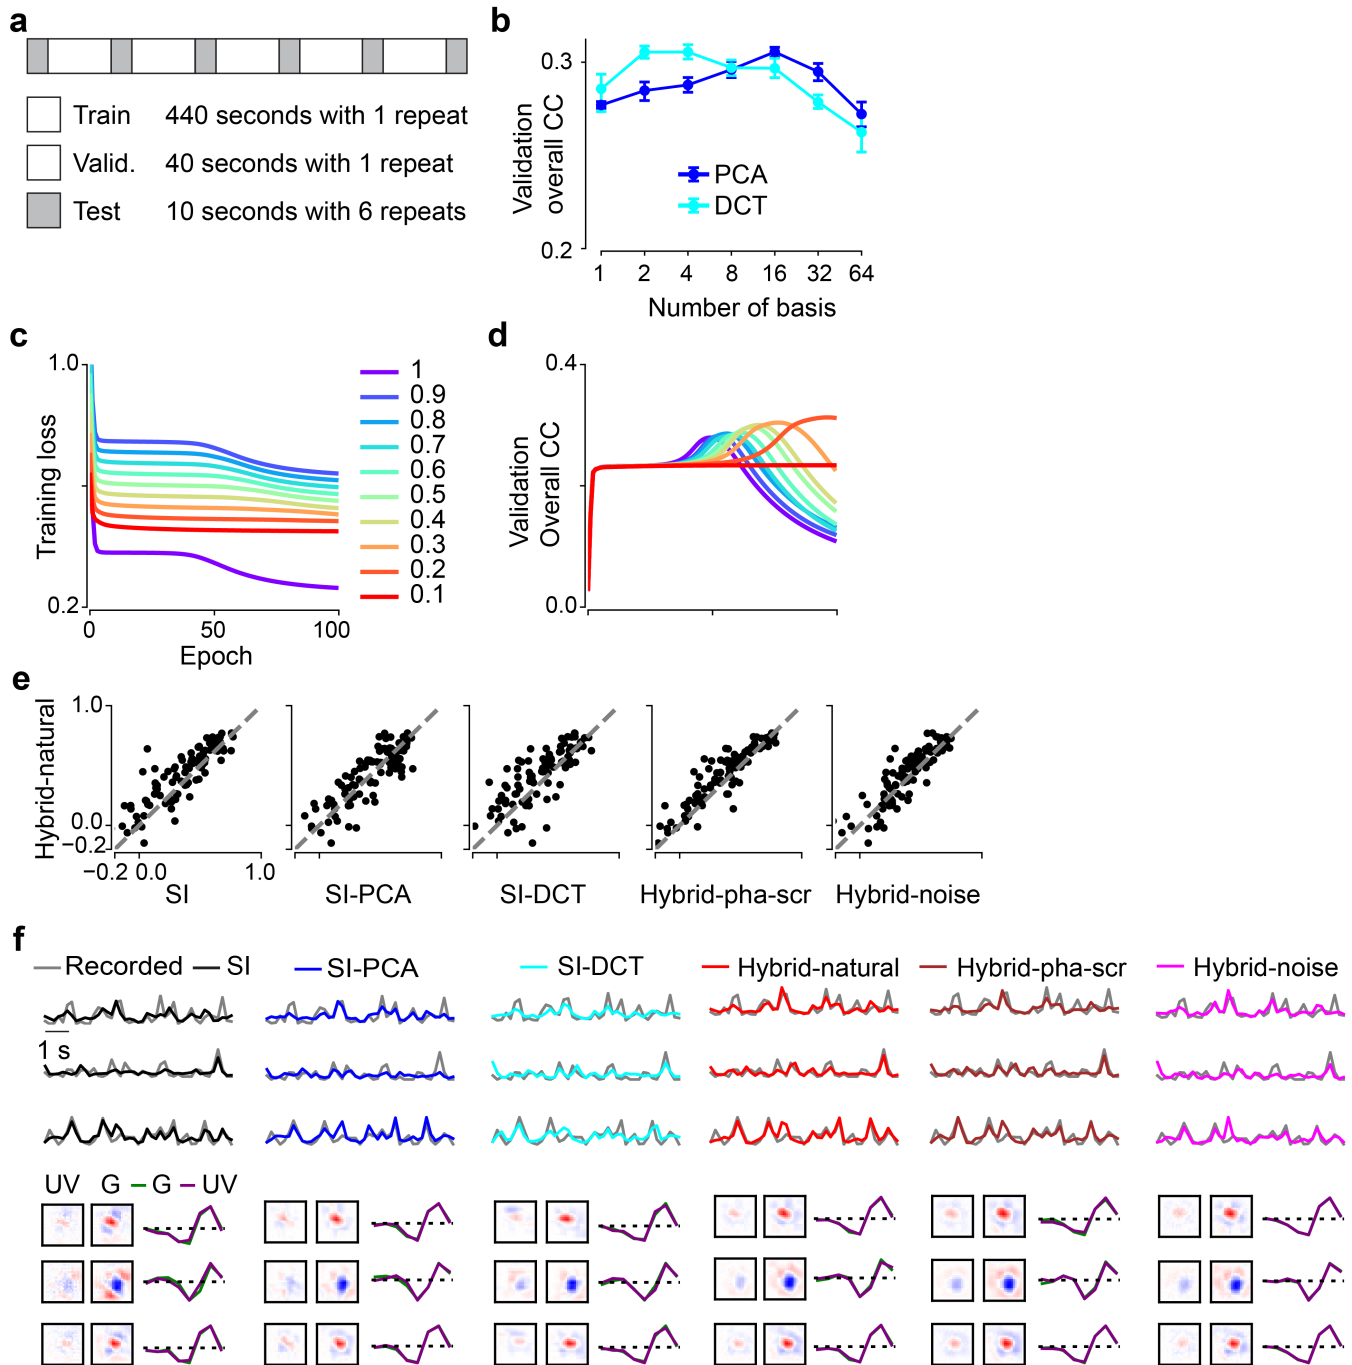

**Supplemental Fig. S1. Training of 2D models.** **a.** The noise stimulus (9 minutes in total) containing training and validation data (1 repeat) and test data (6 repeats). **b.** Model performance (mean) based on validation data for SI-PCA and SI-DCT with different numbers of basis. SI-PCA and SI-DCT yielded best performance when using 16 and 4 bases, respectively (each model for  $n=10$  random seeds; error bars represent 2.5 and 97.5 percentiles with bootstrapping). **c.** Training loss as a function of training epochs for the hybrid model (Input<sub>EC</sub>, natural scenes) with different weights ( $w$ ), indicated by color (right). **d.** Model performance based on validation data (with linear correlation coefficient as metric) during the hybrid-natural model training with different weights (colors as in (c)). As weight decreased from 1 to 0.2, more training epochs were needed to reach the best performance. The hybrid model performed best for  $w = 0.2$ . Note that the hybrid model showed a slower change in correlation coefficient (CC) around the peak at  $w = 0.2$  (compared to  $w = 1$ ), demonstrating the regularization effects of the EC branch on the hybrid model. **e.** Scatter plots for model predictions based on test data at a particular seed (each dot representing one neuron). Hybrid with natural scenes as input<sub>EC</sub> ( $w = 0.2$ ) vs. SI, SI with PCA basis (16 bases), SI with DCT basis (4 bases), hybrid-pha-scr ( $w = 0.3$ ) and hybrid-noise ( $w = 0.4$ ). **f.** Upper: Three representative GCL cell responses (gray traces) to noise stimulus together with predictions of the best performing models on test data (black, SI; blue, SI with PCA basis; cyan, SI with DCT basis; red, hybrid w/ natural scenes as input in EC path; brown, hybrid w/ phase-scrambled scenes as input in EC path; magenta, hybrid w/ noise as input in EC path). Lower: Learned spatio-temporal RFs of the example cells, visualized by SVD. Same random seed as in (e).



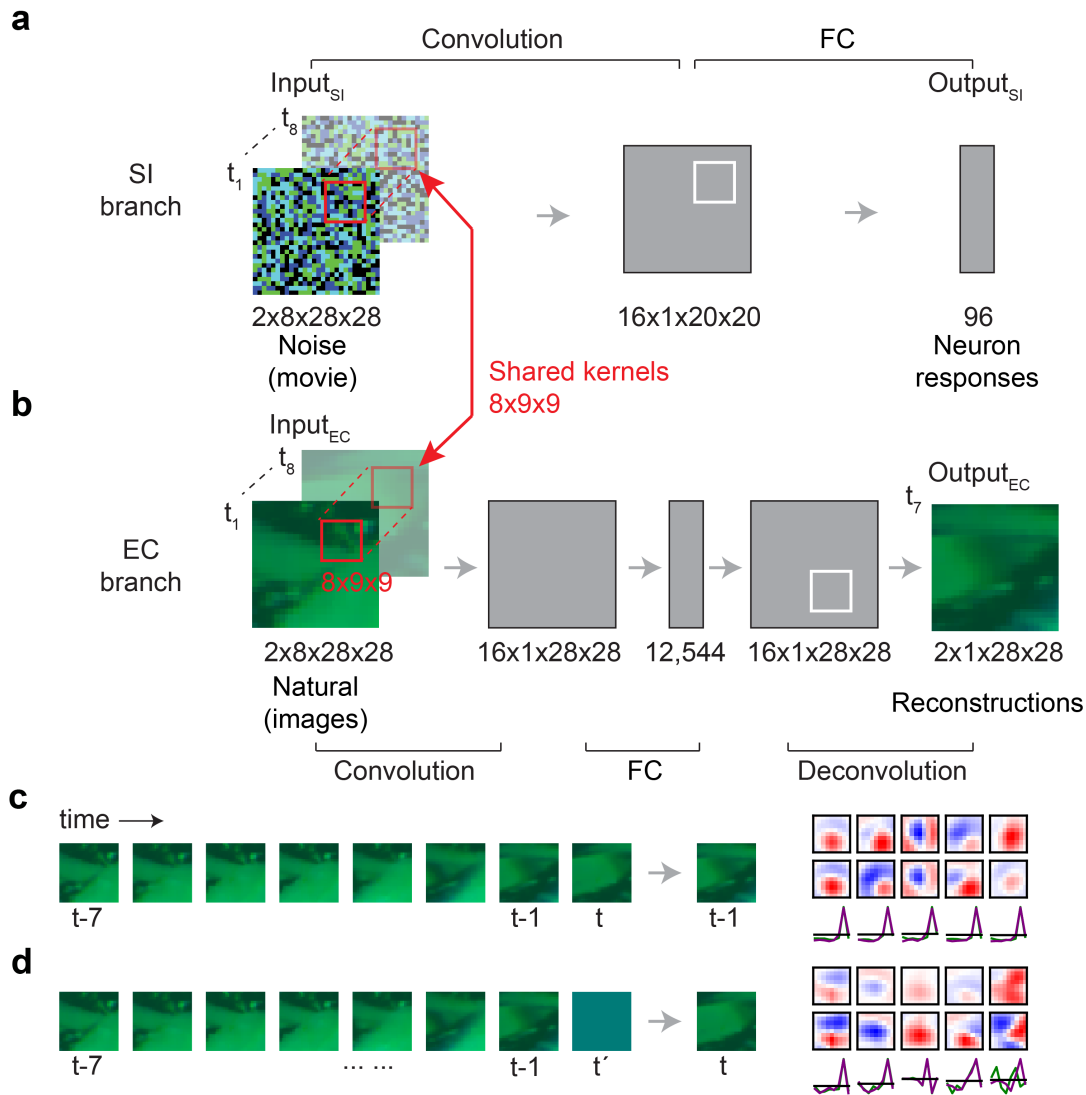

**Supplemental Fig. S 2. Three-dimensional hybrid networks embedding natural movies.** **a,b.** Illustration of SI network (a) with 3D spatio-temporal convolutional filter, and EC network (b), reconstructing the 7<sup>th</sup> frame (at  $t - 1$ ) based on 8 continuous frames ( $t - 7$  to  $t$ ; encoding the past, c). Combined as a hybrid network, the two branches were trained in parallel with shared 3D filters (Input<sub>EC</sub>, 8-frame UV-green movie clip; Output<sub>EC</sub>, reconstruction of the 7<sup>th</sup> frame of Input<sub>EC</sub>). **c.** Example for input/output of the EC model for encoding the past (left; also see b) and exemplary spatio-temporal convolutional filters when using natural movies as input to train the EC model alone (right). **d.** Example for input/output of the EC model for predicting the future, i.e., predicting the 8<sup>th</sup> frame from the first 7 frames ( $t - 7$  to  $t - 1$ ) of the clip, and exemplary spatio-temporal filters when using natural movies as input to train the EC model alone. During preprocessing, the 8<sup>th</sup> frame of input was set to the mean of the first 7 frames, for UV and green channel, respectively. Note that for stand-alone EC models, all temporal components of filters for past encoding were very similar while those for future prediction were much more diverse.

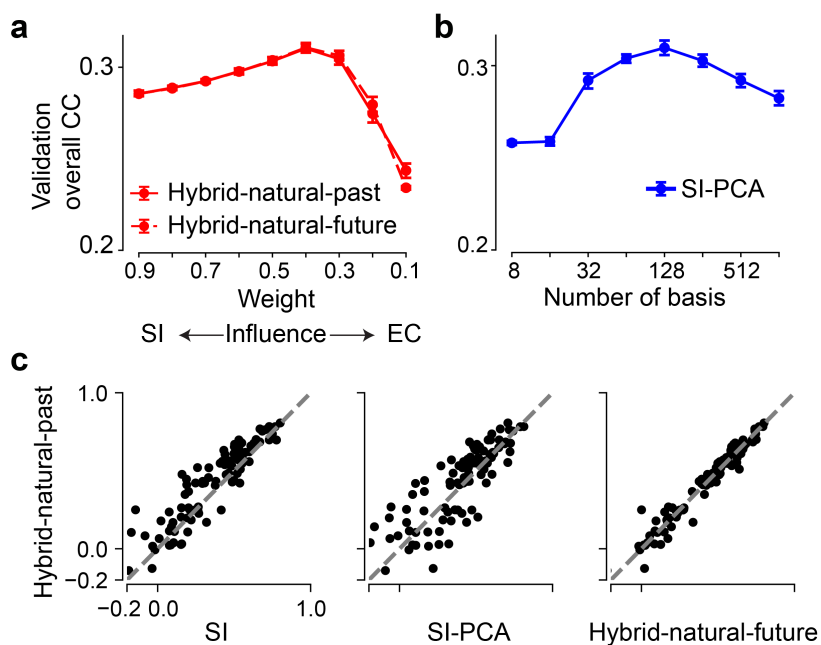

**Supplemental Fig. S 3. Training of 3D hybrid models.** a,b. Model performance (mean) based on validation data for hybrid models w/ natural movies as input<sub>EC</sub> (a), applying past encoding (hybrid-natural-past) or future prediction (hybrid-natural-future) and for different weights, and for the SI-PCA model (b) with different numbers of basis (each model for n=10 random seeds). c. Scatter plots for model predictions based on test data at a particular seed (each dot representing one neuron). hybrid-natural-past ( $w = 0.4$ ) vs. SI, SI-PCA (128 PCA bases) and hybrid-natural-future ( $w = 0.4$ ). Error bars in (a)–(b) represent 2.5 and 97.5 percentiles with bootstrapping. Both 3D hybrid models performed similarly, with a peak in predictive performance on the validation data at around  $w = 0.4$  (a). This value of  $w$  was higher than for the 2D hybrid models ( $w = 0.2$ ; cf. Fig. 3c). We also examined the low-pass filtering effects on the 3D SI model by using PCA filters (3D SI-PCA) and varying the number of basis (b). Like for the 2D case when varying the number of basis, we found a maximum in performance on the validation data at 128 bases, which was larger than the 16 bases in the 2D case (cf. Suppl. Fig. S1b).

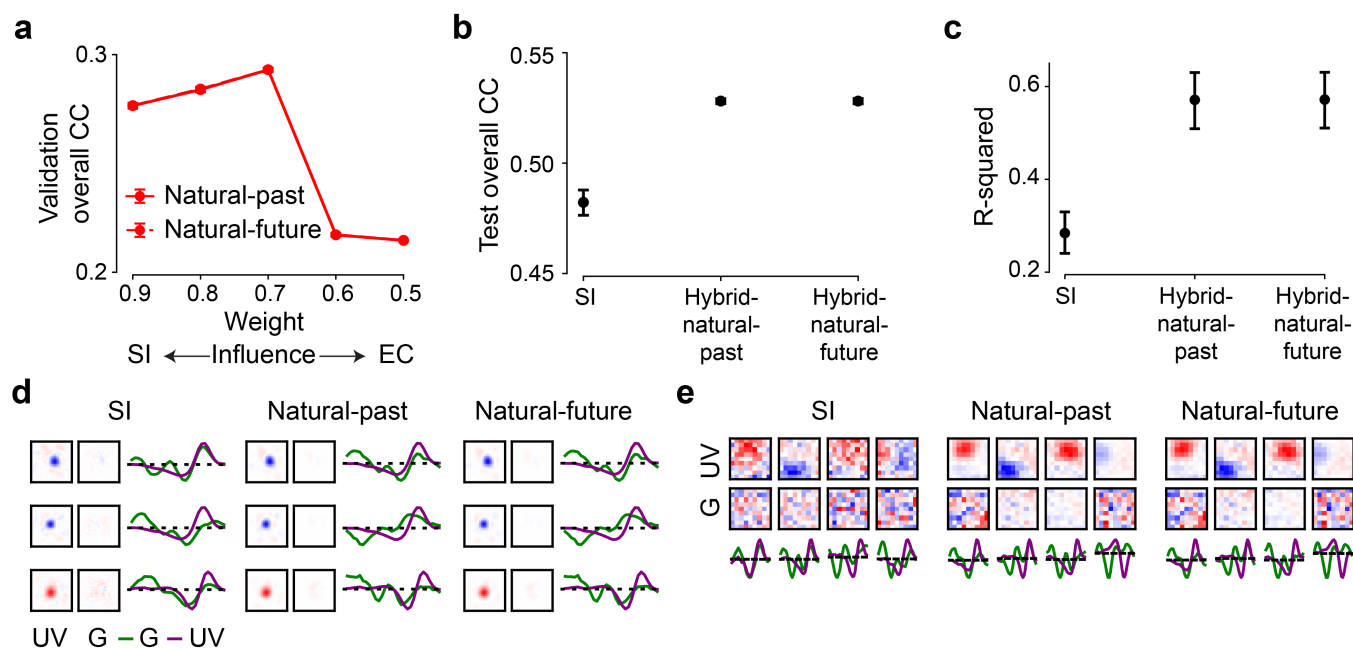

**Supplemental Fig. S 4. Hybrid model for encoding neuronal responses to 30-Hz dense noise.** To test hybrid models for different stimuli, we recorded neuronal responses to the 30-Hz dense noise in the ventral retina. We yielded n=64 neurons after quality control (Methods), which were used to train the SI and hybrid networks. a. Model performance (mean) based on validation data for hybrid models (w/ natural movies as input<sub>EC</sub>), applying encoding-past (hybrid-natural-past) or predicting-future (hybrid-natural-future) and for different weights. Each model for n=10 random seeds. Both models with similar performance for all weights, peaking at  $w = 0.7$ . b. Model performance (mean) based on test data for SI, hybrid-natural-past ( $w = 0.7$ ) and hybrid-natural-future ( $w = 0.7$ ). Each model for n=10 random seeds. The two hybrid models had better performance with smaller standard deviation compared the SI model ( $p < 0.0001$  for SI and hybrid-natural-past,  $p = 0.9992$  for hybrid-natural-past and hybrid-natural-future; two-sided permutation test, n=10,000 repeats). c. R-squared (mean) of fitting a 2D Gaussian to all the spatial filters in UV stimulus channel (each model for n=10 random seeds;  $p < 0.0001$  for SI and hybrid-natural-past,  $p = 0.9888$  for hybrid-natural-past and hybrid-natural-future; two-sided permutation test, n=10,000 repeats). d. Learned spatio-temporal filters of the three representative cells, visualized by SVD. Note that because all neurons in this data set were recorded in the ventral retina, their responses were dominated by the UV channel. Different temporal filters in the UV channel were observed for these neurons (cf. the very similar temporal filters in the green channel for neurons' responses to 5-Hz noise in Fig. 3b, Fig. 5a lower). e. Exemplary shared spatial and temporal filters of 3D models, visualized by SVD and for one random seed. Temporal: UV and green channels indicated by purple and green lines, respectively. Error bars in (a)–(c) represent 2.5 and 97.5 percentiles with bootstrapping.

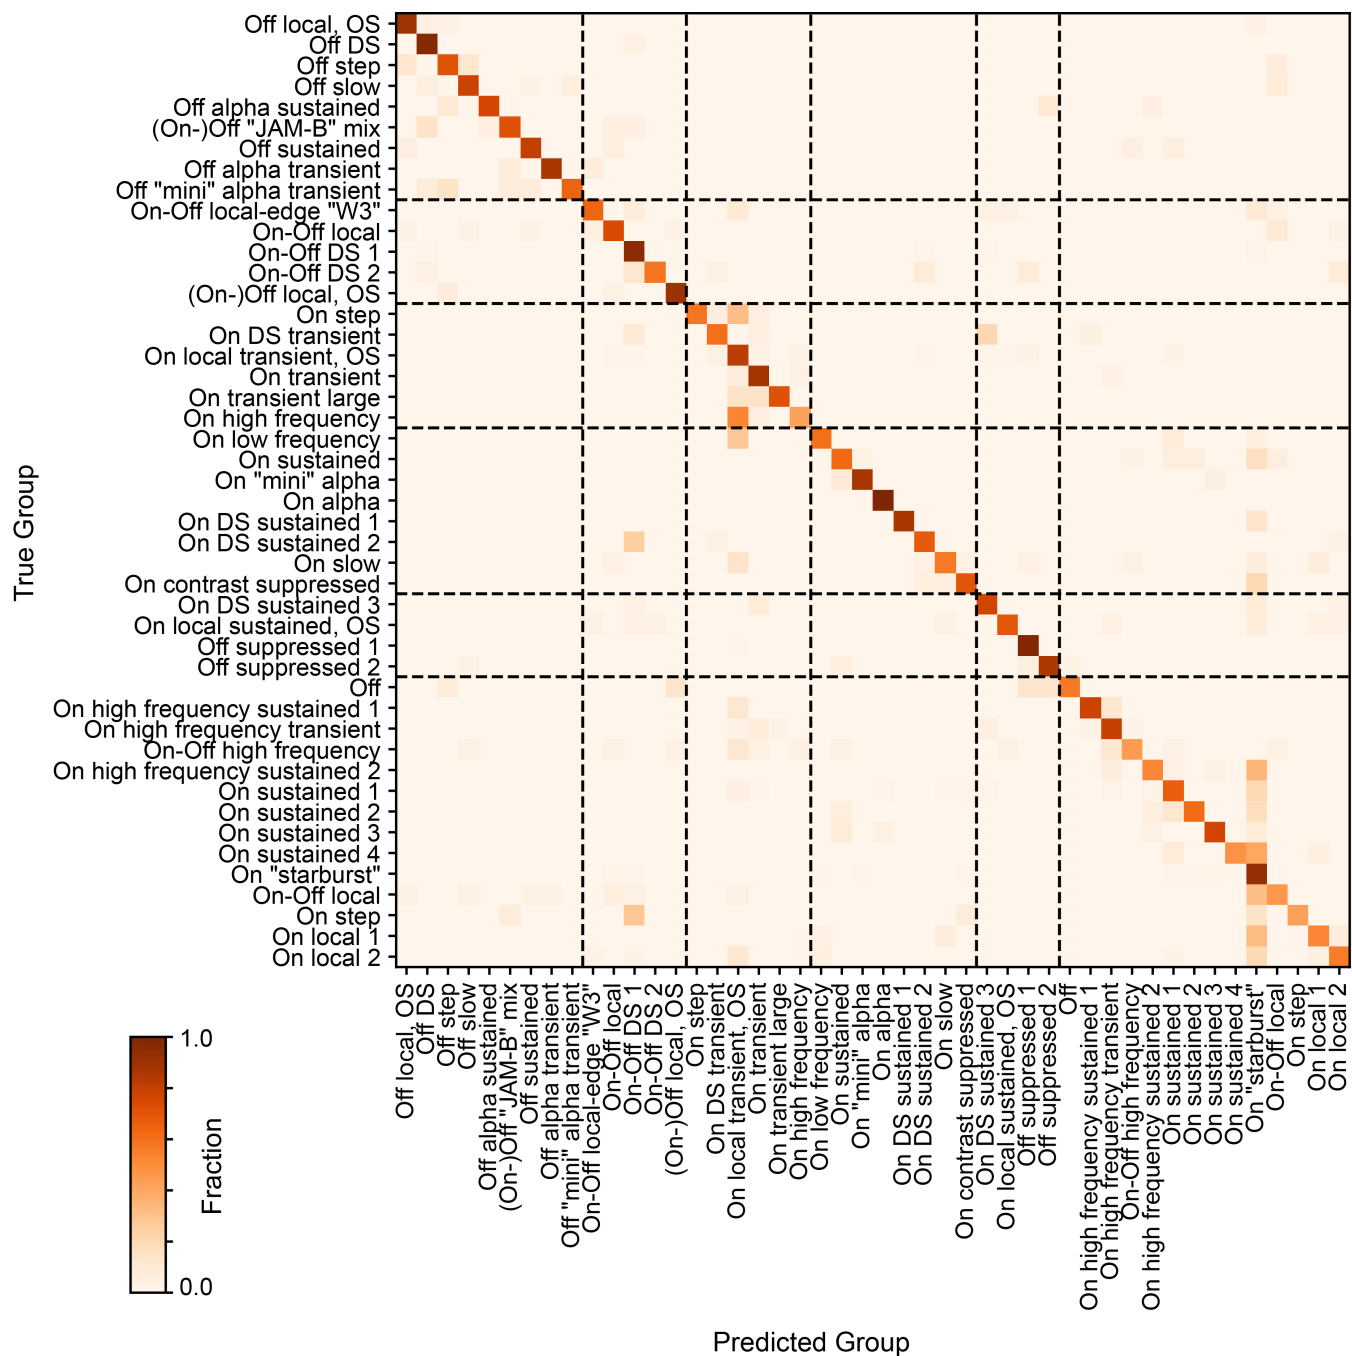

**Supplemental Fig. S 5. Confusion matrix for a trained random forest classifier.** Normalized confusion matrix (true cell types against predicted cell types) for a trained random forest classifier evaluated on a test dataset (for details, see Methods). Dotted line indicates separation of 6 broad functional cell groups (43).

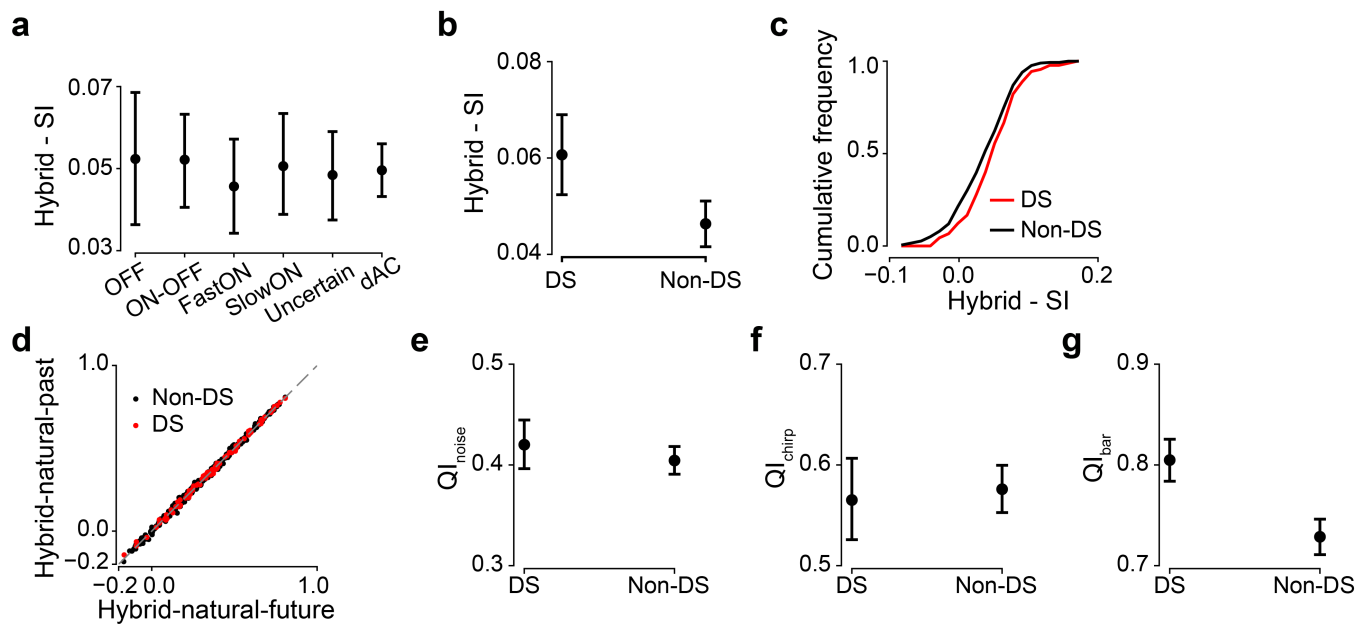

**Supplemental Fig. S 6. Hybrid model for different cell types.** **a.** Performance difference (mean) between hybrid-natural-future and SI based on test data for different cell types (each model for  $n=10$  random seeds). **b.** Performance difference (mean) between hybrid-natural-future and SI based on test data for DS and non-DS cells (each model for  $n=10$  random seeds). **c.** Cumulative histogram of model prediction difference between hybrid-natural-future ( $w = 0.7$ ) and SI on test data, for DS (red) and non-DS cells, at one particular seed. **d.** Scatter plots for model predictions based on test data at a particular seed (each dot representing one neuron) for DS and non-DS cells and hybrid-natural-past ( $w = 0.7$ ) vs. hybrid-natural-future ( $w = 0.7$ ). Note that the predictions of two hybrid models were similar for most of neurons. **e.** Quality index (mean) for DS and non-DS cells based on responses to the repeated test sequences in the noise stimuli ( $p=0.2881$ , two-sided permutation test,  $n=10,000$  repeats; for details, see Methods). **f.** Like (e) but for chirp responses ( $p=0.6714$ , two-sided permutation test,  $n=10,000$  repeats). **g.** Like (e) but for bar stimulus responses ( $p<0.0001$ , two-sided permutation test,  $n=10,000$  repeats). Error bars in (a),(b),(e)-(g) represent 2.5 and 97.5 percentiles with bootstrapping.
